# Supplementary material for: Digital Health Interventions for Hypertension Management in US Populations Experiencing Health Disparities: A Systematic Review and Meta-Analysis
Source: PubMed Central journal article supplement (PMC10867699; doi:10.1001/jamanetworkopen.2023.56070), 2024-02-14
Supplement: jamanetwopen-e2356070-s001.pdf [file jamanetwopen-e2356070-s001.pdf]

## Supplementary Online Content

Katz ME, Mszar R, Grimshaw AA, et al. Digital health interventions for hypertension management in US populations experiencing health disparities: a systematic review and meta-analysis. *JAMA Netw Open*. 2024;7(2):e2356070. doi:10.1001/jamanetworkopen.2023.56070

**eTable 1.** Search Strategies and Additional Methods

**eTable 2.** Additional Study Characteristics for the 28 Included Studies Meeting Eligibility Criteria

**eTable 3.** Baseline Demographic and Socioeconomic Characteristics of Participants in the 28 Included Studies

**eTable 4.** Excluded Studies From the Original Search With Reasons for Exclusion

**eTable 5.** Excluded Studies That Were Eliminated From the Citation Chasing With Corresponding Rationale

**eTable 6.** Subgroup Analysis Showing Change in SBP at 6 Months

**eTable 7.** Subgroup Analysis Showing Change in DBP at 6 Months

**eTable 8.** Subgroup Analysis Showing SBP Values at 6 Months

**eTable 9.** Subgroup Analysis Showing DBP Values at 6 Months

**eFigure 1.** Differences in Diastolic Blood Pressure Changes From Baseline to Follow-Up Time Points Between Digital Health Intervention and Control Groups

**eFigure 2.** Differences in Follow-Up Diastolic Blood Pressures Between Digital Health Intervention and Control Groups at Different Time Points

**eFigure 3.** Sensitivity Analysis for Presence of Publication Bias Using Change in SBP Outcome at 6-Month Follow-Up and Leave-One-Out Meta-Analysis Results for Same Outcome

**eFigure 4.** Sensitivity Analysis for Presence of Publication Bias Using Follow-Up SBP Value Outcome at 6-Month Follow-up and Leave-One-Out Meta-Analysis Results for Same Outcome

**eFigure 5.** Sensitivity Analysis for Presence of Publication Bias Using Change in DBP Outcome at 6-Month Follow-Up and Leave-One-Out Meta-Analysis Results for Same Outcome

**eFigure 6.** Sensitivity Analysis for Presence of Publication Bias Using Follow-Up DBP Value Outcome at 6-Month Follow-Up and Leave-One-Out Meta-Analysis Results for Same Outcome

**eFigure 7.** Risk of Bias Assessment for Included Studies

This supplementary material has been provided by the authors to give readers additional information about their work.

**eTable 1.** Search strategies and additional methodology

|                                |                                                                                                                                                                                                                                                                                                                                                                                                                                                                             |
|--------------------------------|-----------------------------------------------------------------------------------------------------------------------------------------------------------------------------------------------------------------------------------------------------------------------------------------------------------------------------------------------------------------------------------------------------------------------------------------------------------------------------|
| <b>Search for Ovid Embase</b>  |                                                                                                                                                                                                                                                                                                                                                                                                                                                                             |
| 1                              | exp mobile application/                                                                                                                                                                                                                                                                                                                                                                                                                                                     |
| 2                              | exp wearable computer/                                                                                                                                                                                                                                                                                                                                                                                                                                                      |
| 3                              | ((mobile or cell phone or cellular or smartphone or iphone or android or windows or blackberry or handheld or portable or ipad or tablet or phone or telephone) adj3 (app or apps or application* or health or device* or message* or intervention*)).mp.                                                                                                                                                                                                                   |
| 4                              | (health adj3 (app or apps or application* or device*)).mp.                                                                                                                                                                                                                                                                                                                                                                                                                  |
| 5                              | (mHealth or telemedicine or wearable or mobile health or digital treatment* or digital health or ehealth or e-health or m-health or smartwatch* or smart watch* or tele monitor* or telemonitor* or mobile technolog* or text message* or SMS).mp.                                                                                                                                                                                                                          |
| 6                              | 1 or 2 or 3 or 4 or 5                                                                                                                                                                                                                                                                                                                                                                                                                                                       |
| 7                              | exp hypertension/                                                                                                                                                                                                                                                                                                                                                                                                                                                           |
| 8                              | ((high or elevated or raised) adj3 blood pressure*).mp.                                                                                                                                                                                                                                                                                                                                                                                                                     |
| 9                              | (hypertension or hypertensive).mp.                                                                                                                                                                                                                                                                                                                                                                                                                                          |
| 10                             | (blood pressure adj3 (manage* or control* or prevent* or monitor*)).mp.                                                                                                                                                                                                                                                                                                                                                                                                     |
| 11                             | 7 or 8 or 9 or 10                                                                                                                                                                                                                                                                                                                                                                                                                                                           |
| 12                             | 6 and 11                                                                                                                                                                                                                                                                                                                                                                                                                                                                    |
| 13                             | exp socioeconomic/                                                                                                                                                                                                                                                                                                                                                                                                                                                          |
| 14                             | "social determinants of health"/                                                                                                                                                                                                                                                                                                                                                                                                                                            |
| 15                             | health disparity/                                                                                                                                                                                                                                                                                                                                                                                                                                                           |
| 16                             | health care disparity/                                                                                                                                                                                                                                                                                                                                                                                                                                                      |
| 17                             | minority health/                                                                                                                                                                                                                                                                                                                                                                                                                                                            |
| 18                             | health equity/                                                                                                                                                                                                                                                                                                                                                                                                                                                              |
| 19                             | (low* income or low* -income or impoverish* or poverty or homeless or disadvantaged or disenfranchis* or financial* distress* or financial* stress* or economic factor* or socioeconomic* or welfare* or subsidized or economic burden* or underprivilege* or destitute or bankrupt* or poverty-stricken).mp.                                                                                                                                                               |
| 20                             | (social determinant* or implicit attitude* or implicit bias* or health bias* or racial bias* or conscious attitude* or unconscious bias* or nonconscious bias* or non-conscious bias* or conscious bias*).mp.                                                                                                                                                                                                                                                               |
| 21                             | (prejudice* or unequal* or inequit* or disparit* or equalit* or equit* or unequal* or discrimination or injustice* or justice* or racist* or racism* or stigma* or stereotyp*).mp.                                                                                                                                                                                                                                                                                          |
| 22                             | ((minitor* or structural* or cultural* or multi-cultur* or multicultural* or linguistic* or social* or intercultural* or inter-cultural* or cross-cultural or crosscultural or multi-rac* or multi-ethnic* or multiethnic* or multi-lingual or multilingual or trans-cultural or transcultural or ethnocultur* or ethno-cultur* or socio-cultural or sociocultural or bi-rac* or birac*) adj3 (status* or competen* or awareness* or diversit* or discrimin* or bias*)).mp. |
| 23                             | or/13-22                                                                                                                                                                                                                                                                                                                                                                                                                                                                    |
| 24                             | 12 and 23                                                                                                                                                                                                                                                                                                                                                                                                                                                                   |
| <b>Search for Ovid Medline</b> |                                                                                                                                                                                                                                                                                                                                                                                                                                                                             |
| 1                              | Mobile Applications/                                                                                                                                                                                                                                                                                                                                                                                                                                                        |
| 2                              | exp Wearable Electronic Devices/                                                                                                                                                                                                                                                                                                                                                                                                                                            |
| 3                              | ((mobile or cell phone or cellular or smartphone or iphone or android or windows or blackberry or handheld or portable or ipad or tablet or phone or telephone) adj3 (app or apps or application* or health or device* or message* or intervention*)).mp.                                                                                                                                                                                                                   |
| 4                              | (health adj3 (app or apps or application* or device*)).mp.                                                                                                                                                                                                                                                                                                                                                                                                                  |
| 5                              | (mHealth or telemedicine or wearable or mobile health or digital treatment* or digital health or ehealth or e-health or m-health or smartwatch* or smart watch* or tele monitor* or telemonitor* or mobile technolog* or text message* or SMS).mp.                                                                                                                                                                                                                          |
| 6                              | 1 or 2 or 3 or 4 or 5                                                                                                                                                                                                                                                                                                                                                                                                                                                       |
| 7                              | exp Hypertension/                                                                                                                                                                                                                                                                                                                                                                                                                                                           |
| 8                              | ((high or elevated or raised) adj3 blood pressure*).mp.                                                                                                                                                                                                                                                                                                                                                                                                                     |
| 9                              | (hypertension or hypertensive).mp.                                                                                                                                                                                                                                                                                                                                                                                                                                          |
| 10                             | (blood pressure adj3 (manage* or control* or prevent* or monitor*)).mp.                                                                                                                                                                                                                                                                                                                                                                                                     |
| 11                             | 7 or 8 or 9 or 10                                                                                                                                                                                                                                                                                                                                                                                                                                                           |
| 12                             | 6 and 11                                                                                                                                                                                                                                                                                                                                                                                                                                                                    |

13 exp Socioeconomic Factors/  
 14 "Social Determinants of Health"/  
 15 health status disparities/  
 16 Healthcare Disparities/  
 17 Minority Health/  
 18 Health Equity/  
 19 (low\* income or low\*-income or impoverish\* or poverty or homeless or disadvantaged or disenfranchis\* or financial\* distress\* or financial\* stress\* or economic factor\* or socioeconomic\* or welfare\* or subsidized or economic burden\* or underprivilege\* or destitute or bankrupt\* or poverty-stricken).mp.  
 20 (social determinant\* or implicit attitude\* or implicit bias\* or health bias\* or racial bias\* or conscious attitude\* or unconscious bias\* or nonconscious bias\* or non-conscious bias\* or conscious bias\*).mp.  
 21 ((minorit\* or structural\* or cultural\* or multi-cultur\* or multicultural\* or linguistic\* or social\* or intercultural\* or inter-cultural\* or cross-cultural or crosscultural or multi-rac\* or multi-ethnic\* or multiethnic\* or multi-lingual or multilingual or trans-cultural or transcultural or ethnocultur\* or ethno-cultur\* or socio-cultural or sociocultural or bi-rac\* or birac\*) adj3 (status\* or competen\* or awareness\* or diversit\* or discrimin\* or bias\*).mp.  
 22 13 or 14 or 15 or 16 or 17 or 18 or 19 or 20 or 21  
 23 12 and 22

**Search for Web of Science Core Collection**

#1 TS=("low\* income" or "low\*-income" or impoverish\* or poverty or homeless or disadvantaged or disenfranchis\* or "financial\* distress\*" or "financial\* stress\*" or "economic factor\*" or socioeconomic\* or welfare\* or subsidized or "economic burden\*" or underprivilege\* or destitute or bankrupt\* or "poverty-stricken") or TS=("social determinant\*" or "implicit attitude\*" or "implicit bias\*" or "health bias\*" or "racial bias\*" or "conscious attitude\*" or "unconscious bias\*" or "nonconscious bias\*" or "non-conscious bias\*" or "conscious bias\*") or TS=((minorit\* or structural\* or cultural\* or multi-cultur\* or multicultural\* or linguistic\* or social\* or intercultural\* or inter-cultural\* or cross-cultural or crosscultural or multi-rac\* or multi-ethnic\* or multiethnic\* or multi-lingual or multilingual or trans-cultural or transcultural or ethnocultur\* or ethno-cultur\* or socio-cultural or sociocultural or bi-rac\* or birac\*) near/3 (status\* or competen\* or awareness\* or diversit\* or discrimin\* or bias\*))  
 #2 TS=((high or elevated or raised) near/3 "blood pressure\*") or TS=(hypertension or hypertensive) or TS=("blood pressure" near/3 (manage\* or control\* or prevent\* or monitor\*))  
 #3 TS=((mobile or "cell phone" or cellular or smartphone or iphone or android or windows or blackberry or handheld or portable or ipad or tablet or phone or telephone) near/3 (app or apps or application\* or health or device\* or message\* or intervention\*)) or TS=(health near/3 (app or apps or application\* or device\*)) or TS=(mHealth or telemedicine or wearable or "mobile health" or "digital treatment\*" or "digital health" or ehealth or e-health or m-health or smartwatch\* or "smart watch\*" or "tele monitor\*" or telemonitor\* or "mobile technolog\*" or "text message\*" or SMS)  
 #4 #1 and #2 and #3

**Search for Scopus**

( TITLE-ABS-KEY ( "low\* income" OR "low\*-income" OR impoverish\* OR poverty OR homeless OR disadvantaged OR disenfranchis\* OR "financial\* distress\*" OR "financial\* stress\*" OR "economic factor\*" OR socioeconomic\* OR welfare\* OR subsidized OR "economic burden\*" OR underprivilege\* OR destitute OR bankrupt\* OR "poverty-stricken" ) OR TITLE-ABS-KEY ( "social determinant\*" OR "implicit attitude\*" OR "implicit bias\*" OR "health bias\*" OR "racial bias\*" OR "conscious attitude\*" OR "unconscious bias\*" OR "nonconscious bias\*" OR "non-conscious bias\*" OR "conscious bias\*" ) OR TITLE-ABS-KEY ( ( minorit\* OR structural\* OR cultural\* OR multi-cultur\* OR multicultural\* OR linguistic\* OR social\* OR intercultural\* OR inter-cultural\* OR cross-cultural OR crosscultural OR multi-rac\* OR multi-ethnic\* OR multiethnic\* OR multi-lingual OR multilingual OR trans-cultural OR transcultural OR ethnocultur\* OR ethno-cultur\* OR socio-cultural OR sociocultural OR bi-rac\* OR birac\* ) W/3 ( status\* OR competen\* OR awareness\* OR diversit\* OR discrimin\* OR bias\* ) ) ) AND ( TITLE-ABS-KEY ( ( high OR elevated OR raised ) W/3 "blood pressure\*" ) OR TITLE-ABS-KEY ( hypertension OR hypertensive ) OR TITLE-ABS-KEY ( "blood pressure" W/3 ( manage\* OR control\* OR prevent\* OR monitor\* ) ) ) AND ( TITLE-ABS-KEY ( ( mobile OR "cell

phone" OR cellular OR smartphone OR iphone OR android OR windows OR blackberry OR handheld OR portable OR ipad OR tablet OR phone OR telephone ) W/3 ( app OR apps OR application\* OR health OR device\* OR message\* OR intervention\* ) ) OR TITLE-ABS-KEY ( health W/3 ( app OR apps OR application\* OR device\* ) ) OR TITLE-ABS-KEY ( mhealth OR telemedicine OR wearable OR "mobile health" OR "digital treatment\*" OR "digital health" OR ehealth OR e-health OR m-health OR smartwatch\* OR "smart watch\*" OR "tele monitor\*" OR telemonitor\* OR "mobile technolog\*" OR "text message\*" OR sms ) )

**Search for Google Scholar**

hypertension mhealth

**Search for Pubmed**

((low\* income or low\*-income or impoverish\* or poverty or homeless or disadvantaged or disenfranchis\* or financial\* distress\* or financial\* stress\* or economic factor\* or socioeconomic\* or welfare\* or subsidized or economic burden\* or underprivilege\* or destitute or bankrupt\* or poverty-stricken or social determinant\* or implicit attitude\* or implicit bias\* or health bias\* or racial bias\* or conscious attitude\* or unconscious bias\* or nonconscious bias\* or non-conscious bias\* or conscious bias\*) AND (high blood pressure\* or elevated blood pressure\* or raised blood pressure\* or hypertension or hypertensive or blood pressure monitor\* or blood pressure control\* or blood pressure prevent\*)) AND ((mHealth or telemedicine or wearable or mobile health or digital treatment\* or digital health or ehealth or e-health or m-health or smartwatch\* or smart watch\* or tele monitor\* or telemonitor\* or mobile technolog\* or text message\* or SMS or health app\*))

**Search for Cochrane Library**

#1 ("low\* income" or "low\*-income" or impoverish\* or poverty or homeless or disadvantaged or disenfranchis\* or "financial\* distress\*" or "financial\* stress\*" or "economic factor\*" or socioeconomic\* or welfare\* or subsidized or "economic burden\*" or underprivilege\* or destitute or bankrupt\* or "poverty-stricken"):ti,ab or ("social determinant\*" or "implicit attitude\*" or "implicit bias\*" or "health bias\*" or "racial bias\*" or "conscious attitude\*" or "unconscious bias\*" or "nonconscious bias\*" or "non-conscious bias\*" or "conscious bias\*"):ti,ab or ((minorit\* or structural\* or cultural\* or multi-cultur\* or multicultural\* or linguistic\* or social\* or intercultural\* or inter-cultural\* or cross-cultural or crosscultural or multi-rac\* or multi-ethnic\* or multiethnic\* or multi-lingual or multilingual or trans-cultural or transcultural or ethnocultur\* or ethno-cultur\* or socio-cultural or sociocultural or bi-rac\* or birac\*) near/3 (status\* or competen\* or awareness\* or diversit\* or discrimin\* or bias\*)):ti,ab  
#2 ((high or elevated or raised) near/3 "blood pressure\*"):ti,ab or (hypertension or hypertensive):ti,ab or ("blood pressure" near/3 (manage\* or control\* or prevent\* or monitor\*)):ti,ab  
#3 ((mobile or "cell phone" or cellular or smartphone or iphone or android or windows or blackberry or handheld or portable or ipad or tablet or phone or telephone) near/3 (app or apps or application\* or health or device\* or message\* or intervention\*)):ti,ab or (health near/3 (app or apps or application\* or device\*)):ti,ab or (mHealth or telemedicine or wearable or "mobile health" or "digital treatment\*" or "digital health" or ehealth or e-health or m-health or smartwatch\* or "smart watch\*" or "tele monitor\*" or telemonitor\* or "mobile technolog\*" or "text message\*" or SMS):ti,ab  
#4 #1 and #2 and #3

**eTable 2.** Additional study characteristics for the included studies (n=28) meeting our eligibility criteria

| Study              | BP as Primary Outcome | Study Setting / Community Engagement                                                                                                                                                                                                                                                                      | Study Duration | Trial Name, if applicable                                                                                                       |
|--------------------|-----------------------|-----------------------------------------------------------------------------------------------------------------------------------------------------------------------------------------------------------------------------------------------------------------------------------------------------------|----------------|---------------------------------------------------------------------------------------------------------------------------------|
| Naqvi, 2022        | No, feasibility       | Comprehensive Stroke Center that serves a majority of Hispanic low-income community.                                                                                                                                                                                                                      | 2020-2021      | Telehealth After Stroke Care (TASC) trial                                                                                       |
| Brewer, 2022       | No, LS7 score         | Community-based participatory research; Community Steering Committee provided study oversight to ensure its community centeredness; community input through an iterative, semi structured focus group series with African American community members affiliated with partnering African American churches | 2019-2020      | FAITH! Trial (Fostering African American Improvement in Total Health)                                                           |
| Clark, 2021        | Yes                   | N/A                                                                                                                                                                                                                                                                                                       | 2018-2020      | N/A                                                                                                                             |
| Schoenthaler, 2020 | No, feasibility       | Safety net primary care clinic in New York City, which serves a predominately diverse, low-income urban patient population                                                                                                                                                                                | 2016-2018      | N/A                                                                                                                             |
| Vaughan, 2020      | Yes                   | Nonprofit clinic serving primarily low-income and uninsured individuals                                                                                                                                                                                                                                   | N/A            | A Telehealth-supported, Integrated care with CHWs, and MEducation-access (TIME)                                                 |
| Zha, 2020          | Yes                   | Local community health center                                                                                                                                                                                                                                                                             | 2016-2017      | Improve Hypertension Monitoring and Self-management by Using mHealth                                                            |
| Schroeder, 2020    | Yes                   | Urban Indian Health Organization; First Nations Community HealthSource (FNCH), a UIHO that provides community-based health and human services to AI/AN and other vulnerable populations                                                                                                                   | 2017-2019      | Controlling Hypertension in Native American and Other Populations                                                               |
| Still, 2020        | Yes                   | Affiliated community clinics, as well as from community outreach and engagements; CCBN nurses serve as a bridge between underserved communities and their healthcare needs                                                                                                                                | 2018-2019      | Technology-based Intervention and Positive Psychological Training for Blood Pressure Control in African Americans (TechSupport) |
| Persell, 2020      | Yes                   | Outpatient clinics affiliated with a large health care system                                                                                                                                                                                                                                             | 2017-2019      | The Smart Hypertension Control Study (iSmartHyp)                                                                                |
| Chandler, 2019     | Yes                   | N/A                                                                                                                                                                                                                                                                                                       | N/A            | Smartphone Med Adherence Stops Hypertension, SMASH                                                                              |
| Bennett, 2018      | No, weight change     | Community health center system serving primarily racial/ethnic minority patients and those with a low-income and/or lack of insurance                                                                                                                                                                     | 2013-2015      | New Media Obesity Treatment in Community Health Centers                                                                         |
| Bosworth, 2018     | No, CVD risk score    | N/A -- VA Health System                                                                                                                                                                                                                                                                                   | 2011-2015      | The CITIES Trial                                                                                                                |

|                |                           |                                                                                                                                                                                                                                                                                                                                                                  |           |                                                                                              |
|----------------|---------------------------|------------------------------------------------------------------------------------------------------------------------------------------------------------------------------------------------------------------------------------------------------------------------------------------------------------------------------------------------------------------|-----------|----------------------------------------------------------------------------------------------|
| Skolarus, 2018 | Yes                       | Reach Out was a collaborative program given it was both faith placed, with the church involved in recruiting and delivering the intervention and faith based initiative, with church health team involvement. Community and academic partners, church health teams and church leadership, including pastors and elders, were present for the recruitment events. | 2014-2015 | Community Study to Reduce High Blood Pressure Through Text Messaging (REACH OUT)             |
| Morawski, 2018 | Yes                       | N/A                                                                                                                                                                                                                                                                                                                                                              | 2016-2017 | Medication Adherence Improvement Support App For Engagement - Blood Pressure (MedISAFE-BP)   |
| Fortmann, 2017 | No, HbA1C                 | Participant recruitment from clinic sites within a network of federally qualified health centers serving racial/ethnic minority and low-income individuals                                                                                                                                                                                                       | 2012-2014 | Dulce Digital Study                                                                          |
| Frias, 2017    | Yes                       | Multiple outpatient primary care sites                                                                                                                                                                                                                                                                                                                           | 2015-2016 | Proteus Discover in Subjects With Uncontrolled Hypertension and Type 2 Diabetes              |
| Tuot, 2016     | Yes                       | 2 primary care clinics (1 academic training site and 1 community clinic) in a public health care delivery system                                                                                                                                                                                                                                                 | 2013-2015 | Kidney Awareness Registry and Education (KARE)                                               |
| Bove, 2013     | Yes                       | Participant recruitment through advertisement and communication at local churches and community centers                                                                                                                                                                                                                                                          | 2008-2010 | Using a Telemedicine System to Promote Patient Care Among Underserved Individuals (AHRQ)     |
| Crowley, 2013  | Yes                       | Multiple clinics where PCPs care for a large proportion of African-American patients; cultural sensitivity training for research staff                                                                                                                                                                                                                           | 2008-2011 | The CHANGE Study                                                                             |
| Rifkin, 2013   | No, mHealth acceptability | N/A -- VA Health System                                                                                                                                                                                                                                                                                                                                          | N/A       | N/A                                                                                          |
| Margolis, 2013 | Yes                       | Multispecialty practice part of an integrated health system                                                                                                                                                                                                                                                                                                      | 2009-2012 | Home Blood Pressure Telemonitoring and Case Management to Control Hypertension (Hyperlink)   |
| Bennett, 2012  | No, weight change         | Multiple urban community health centers that serving primarily racial/ethnic minority patients; provided tailored information on community resources for healthy behaviors; trained community health educators                                                                                                                                                   | 2008-2011 | Be Fit, Be Well                                                                              |
| McKee, 2011    | Yes                       | Federally qualified health center; trained home health nurses                                                                                                                                                                                                                                                                                                    | N/A       | N/A                                                                                          |
| Frosch, 2011   | No, HbA1C                 | Multiple academic primary care practices and one community-based safety net clinics caring for poor and uninsured patients                                                                                                                                                                                                                                       | 2008-2010 | Improving Diabetes Care With Patient Decision Aids - A Trial in Community-based Primary Care |
| Anderson       | No                        | Community health center serving predominantly Hispanic individuals and those with a low-income and lack of insurance                                                                                                                                                                                                                                             | N/A       | Managing the Space Between Visits (MSBV)                                                     |
| Brennan, 2010  | Yes                       | DM nurses received cultural competency training                                                                                                                                                                                                                                                                                                                  | 2006-2007 | N/A                                                                                          |

|                |     |                                                     |           |                                                              |
|----------------|-----|-----------------------------------------------------|-----------|--------------------------------------------------------------|
| Bosworth, 2009 | Yes | Multiple university-affiliated primary care clinics | 2004-2008 | Take Control of Your Blood Pressure (TCYB)                   |
| Shea, 2009     | Yes | Primary care practices                              | 2000-2007 | Randomized Trial of Telemedicine for Diabetes Care (IDEATel) |

**eTable 3.** Baseline demographic and socioeconomic characteristics of participants in the included studies (n=28)

| Author, year                     | Sample Size  | Mean (SD) Age, years | Women n (%)         | Black n (%)         | Hispanic n (%)      | Education <HS n (%) | Low Income n (%)    | Medicaid n (%)      | Medicare n (%)      | Uninsured n (%)  |
|----------------------------------|--------------|----------------------|---------------------|---------------------|---------------------|---------------------|---------------------|---------------------|---------------------|------------------|
| Naqvi, 2022 <sup>54</sup>        | 50           | 64.3 (14.0)          | 18 (36.0)           | 16 (32.0)           | 22 (44.0)           | 16 (32.0)           | –                   | 14 (28.0)           | 13 (26.0)           | 4 (8.0)          |
| Brewer, 2022 <sup>50</sup>       | 68           | 54.2 (12.3)          | 48 (70.6)           | 68 (100.0)          | –                   | 7 (10.6)            | 11 (19.0)           | –                   | –                   | 8 (12.1)         |
| Clark, 2021 <sup>29</sup>        | 991          | 59.9 (14.2)          | 662 (66.5)          | 549 (56.5)          | –                   | 33 (27.5)           | 56 (46.7)           | –                   | –                   | –                |
| Schoenthaler, 2020 <sup>55</sup> | 42           | 57.6 (11.1)          | 19 (45.2)           | 42 (100.0)          | –                   | 5 (11.9)            | 26 (62.8)           | 19 (45.3)           | 7 (16.7)            | 8 (19.0)         |
| Vaughan, 2020 <sup>45</sup>      | 89           | 54.9 (8.1)           | 64 (71.9)           | –                   | 89 (100.0)          | –                   | 89 (100.0)          | –                   | –                   | –                |
| Zha, 2020 <sup>56</sup>          | 25           | 52.2 (6.6)           | 22 (88.0)           | 24 (96.0)           | 1 (4.0)             | –                   | –                   | –                   | –                   | –                |
| Schroeder, 2020 <sup>32</sup>    | 295          | 53.4 (11.3)          | 176 (59.7)          | 14 (4.8)            | 153 (51.9)          | 111 (37.8)          | 213 (72.2)          | 46 (15.6)           | 46 (15.6)           | 2 (0.7)          |
| Still, 2020 <sup>42</sup>        | 60           | 59.5 (8.9)           | 45 (75.0)           | 60 (100.0)          | –                   | –                   | 16 (26.7)           | –                   | –                   | –                |
| Persell, 2020 <sup>57</sup>      | 297          | 59.0 (12.8)          | 182 (61.3)          | 103 (34.7)          | 23 (7.7)            | 5 (1.7)             | –                   | –                   | –                   | –                |
| Tuot, 2019 <sup>58</sup>         | 137          | 58.0 (10.4)          | 71 (51.8)           | 58 (42.3)           | 50 (36.5)           | 46 (33.6)           | –                   | 61 (44.5)           | 37 (27.0)           | 39 (28.4)        |
| Chandler, 2019 <sup>59</sup>     | 54           | 45.6 (7.7)           | 36 (66.7)           | –                   | 54 (100.0)          | 39 (72.0)           | 36 (66.5)           | –                   | –                   | –                |
| Bennett, 2018 <sup>60</sup>      | 351          | 50.7 (8.9)           | 239 (68.0)          | 183 (52.0)          | 44 (13.0)           | 51 (15.0)           | 180 (51.0)          | –                   | –                   | 175 (50.0)       |
| Bosworth, 2018 <sup>61</sup>     | 428          | 61.2 (8.7)           | 65 (15.2)           | 213 (50.0)          | 14 (3.3)            | 128 (29.9)          | –                   | –                   | –                   | –                |
| Skolarus, 2018 <sup>43</sup>     | 94           | 58 (9.8)             | 74 (79.0)           | 91 (97.0)           | –                   | –                   | –                   | 21 (22.0)           | 15 (16.0)           | 7 (7.0)          |
| Morawski, 2018 <sup>62</sup>     | 411          | 52.1 (10.3)          | 247 (60.1)          | 103 (25.1)          | –                   | 8 (1.9)             | –                   | –                   | –                   | –                |
| Fortmann, 2017 <sup>30</sup>     | 126          | 48.5 (9.8)           | 94 (74.5)           | –                   | 126 (100.0)         | 90 (73.0)           | 109 (87.5)          | –                   | –                   | 95 (75.5)        |
| Frias, 2017 <sup>63</sup>        | 109          | 59.4 (13.6)          | 55 (50.5)           | 17 (15.6)           | 51 (46.8)           | 34 (31.2)           | 62 (56.9)           | –                   | –                   | –                |
| Bove, 2013 <sup>47</sup>         | 241          | 59.6 (13.6)          | 157 (65.1)          | 195 (80.9)          | 7 (2.9)             | 39 (16.2)           | 128 (53.1)          | 37 (15.4)           | 82 (34.0)           | 13 (5.4)         |
| Crowley, 2013 <sup>44</sup>      | 359          | 56.5 (12.0)          | 258 (72.0)          | 359 (100.0)         | –                   | 108 (30.0)          | 135 (37.6)          | 59 (16.5)           | 147 (40.9)          | 21 (5.8)         |
| Rifkin, 2013 <sup>64</sup>       | 43           | 68.3 (7.9)           | 2 (4.7)             | 11 (25.6)           | –                   | –                   | –                   | –                   | –                   | –                |
| Margolis, 2013 <sup>31</sup>     | 450          | 61.1 (12.0)          | 201 (44.7)          | 53 (11.8)           | 10 (2.2)            | 76 (17.4)           | 65 (17.0)           | –                   | –                   | –                |
| Bennett, 2012 <sup>46</sup>      | 365          | 54.6 (10.9)          | 250 (68.5)          | 260 (71.2)          | 48 (13.2)           | 120 (32.9)          | 199 (54.5)          | 123 (33.7)          | 75 (20.5)           | –                |
| McKee, 2011 <sup>65</sup>        | 55           | 60.0 (9.7)           | 36 (66.7)           | 13 (23.6)           | 40 (72.7)           | 26 (47.3)           | 40 (72.7)           | 34 (61.8)           | –                   | 4 (7.3)          |
| Frosch, 2011 <sup>48</sup>       | 201          | 55.5 (8.6)           | 97 (48.5)           | 32 (16.1)           | 112 (55.7)          | 115 (57.0)          | 174 (86.5)          | –                   | –                   | 136 (67.7)       |
| Anderson, 2010 <sup>49</sup>     | 295          | –                    | 171 (58.0)          | 27 (9.2)            | 223 (75.6)          | 260 (88.1)          | –                   | 126 (42.7)          | 72 (24.4)           | 44 (14.9)        |
| Brennan, 2010 <sup>66</sup>      | 638          | 55.7 (11.5)          | 427 (66.9)          | 638 (100.0)         | –                   | 39 (5.2)            | 256 (40.1)          | –                   | –                   | –                |
| Bosworth, 2009 <sup>67</sup>     | 318          | 61.5 (12.0)          | 200 (62.9)          | 154 (48.5)          | –                   | 113 (35.5)          | 60 (18.9)           | –                   | –                   | –                |
| Shea, 2009 <sup>68</sup>         | 1,665        | 70.8 (6.6)           | 1,046 (62.8)        | 248 (14.9)          | 586 (35.2)          | –                   | –                   | 651 (39.1)          | 1,665 (100.0)       | –                |
| <b>Pooled</b>                    | <b>8,257</b> | <b>57.2 (10.4)</b>   | <b>4,962 (60.1)</b> | <b>3,531 (42.8)</b> | <b>1,631 (19.8)</b> | <b>1,471 (17.8)</b> | <b>1,884 (22.8)</b> | <b>1,177 (14.3)</b> | <b>2,146 (26.0)</b> | <b>548 (6.6)</b> |



**eTable 4.** Excluded studies from the original search with reasons for exclusion.

| First Author's Last Name | Year | Title                                                                                                                                                                                            | Journal                                           | Reason for Exclusion          |
|--------------------------|------|--------------------------------------------------------------------------------------------------------------------------------------------------------------------------------------------------|---------------------------------------------------|-------------------------------|
| Abughosh                 | 2015 | Impact of a pharmacist telephone intervention on medication adherence among hypertensive patients with diabetes in a medicare advantage plan                                                     | Value in Health                                   | Wrong outcomes                |
| Abughosh                 | 2016 | A Pharmacist Telephone Intervention to Identify Adherence Barriers and Improve Adherence Among Nonadherent Patients with Comorbid Hypertension and Diabetes in a Medicare Advantage Plan         | Journal of Managed Care & Specialty Pharmacy      | Wrong outcomes                |
| Actrn                    | 2020 | Home-based blood pressure monitoring of Hypertensive Diseases in Pregnancy - A randomised controlled trial (REMOTE CONTROL trial)                                                                | Clinicaltrials.gov                                | Protocol                      |
| Afarideh                 | 2016 | Text message support for weight loss in patients with prediabetes: A randomized clinical trial. Diabetes care 2016;39:1364-1370                                                                  | Diabetes Care                                     | No original data              |
| Agarwal                  | 2019 | Closing Gaps in Cardiovascular Disease Prevention Through Community-Centered Primary Health Care Interventions                                                                                   | JAMA Cardiology                                   | No original data              |
| Agnihothri               | 2021 | Mobile health application usage and quality of care at a hypertension clinic: an observational cohort study                                                                                      | Journal of Hypertension                           | Insufficient data             |
| Aikens                   | 2014 | Diabetes self-management support using mHealth and enhanced informal caregiving                                                                                                                  | Journal of Diabetes and its Complications         | Wrong outcomes                |
| Albini                   | 2016 | An ICT and mobile health integrated approach to optimize patients' education on hypertension and its management by physicians: the Patients Optimal Strategy of Treatment(POST) pilot study      | Conference proceedings :                          | Ineligible patient population |
| Allen                    | 2019 | SMS-facilitated home blood pressure monitoring: A qualitative analysis of resultant health behavior change                                                                                       | Patient Education and Counseling                  | Wrong outcomes                |
| Anthony                  | 2015 | Outpatient blood pressure monitoring using bi-directional text messaging                                                                                                                         | Journal of the American Society of Hypertension   | Wrong outcomes                |
| Arkerson                 | 2023 | Remote Monitoring Compared with In-Office Surveillance of Blood Pressure in Patients with Pregnancy-Related Hypertension: A Randomized Controlled Trial                                          | Obstetrics and Gynecology                         | Wrong patient population      |
| Arora                    | 2012 | A mobile health intervention for inner city patients with poorly controlled diabetes: proof-of-concept of the TExT-MED program                                                                   | Diabetes technology & therapeutics                | Wrong outcomes                |
| Asgary                   | 2015 | Perceptions, attitudes, and experience regarding mHealth among homeless persons in New York City shelters                                                                                        | Journal of health communication                   | Wrong study design            |
| Ayala                    | 2017 | Environmental scan of telemedicine networks with services for hypertension management, 2016                                                                                                      | Circulation: Cardiovascular Quality and Outcomes. | Wrong outcomes                |
| Baggett                  | 2018 | Cardiovascular disease and homelessness                                                                                                                                                          | Journal of the American College of Cardiology     | No original data              |
| Baig                     | 2010 | A randomized community-based intervention trial comparing faith community nurse referrals to telephone-assisted physician appointments for health fair participants with elevated blood pressure | J Gen Intern Med                                  | Wrong intervention            |

|              |      |                                                                                                                                                                                                                                            |                                               |                               |
|--------------|------|--------------------------------------------------------------------------------------------------------------------------------------------------------------------------------------------------------------------------------------------|-----------------------------------------------|-------------------------------|
| Banala       | 2023 | Improving Hypertension Management through a Deviceless Remote Monitoring Program at a Safety-Net Resident Continuity Clinic                                                                                                                | Journal of General Internal Medicine          | Insufficient data             |
| Becker       | 2014 | mHealth 2.0: experiences, possibilities, and perspectives                                                                                                                                                                                  | JMIR mHealth and uHealth                      | No original data              |
| Becker       | 2016 | Feasibility of mhealth technology use among a sample of isolated rural men at high risk for cardiovascular disease                                                                                                                         | Cardiopulmonary Physical Therapy Journal      | Wrong outcomes                |
| Bennett      | 2009 | The effectiveness of health coaching, home blood pressure monitoring, and home-titration in controlling hypertension among low-income patients: protocol for a randomized controlled trial                                                 | BMC Public Health                             | Protocol                      |
| Beran        | 2018 | Key components of success in a randomized trial of blood pressure telemonitoring with medication therapy management pharmacists                                                                                                            | J Am Pharm Assoc                              | No original data              |
| Black        | 2014 | A remote monitoring and telephone nurse coaching intervention to reduce readmissions among patients with heart failure: study protocol for the Better Effectiveness After Transition - Heart Failure (BEAT-HF) randomized controlled trial | Trials                                        | Protocol                      |
| Blixen       | 2018 | Patient participation in the development of a customized m-Health intervention to improve medication adherence in poorly adherent individuals with bipolar disorder (BD) and hypertension (HTN)                                            | International journal of healthcare           | Wrong study design            |
| Blixen       | 2018 | Patient participation in the development of a customized m-Health intervention to improve medication adherence in poorly adherent individuals with bipolar disorder (BD) and hypertension (HTN)                                            | International journal of healthcare           | Duplicate                     |
| Blood        | 2023 | Results of a Remotely Delivered Hypertension and Lipid Program in More Than 10000 Patients Across a Diverse Health Care Network                                                                                                            | Jama Cardiology                               | Wrong patient population      |
| Boden-Albala | 2019 | Efficacy of a Discharge Educational Strategy vs Standard Discharge Care on Reduction of Vascular Risk in Patients With Stroke and Transient Ischemic Attack The DESERVE Randomized Clinical Trial                                          | Jama Neurology                                | Wrong intervention            |
| Bosworth     | 2011 | Racial differences in two self-management hypertension interventions                                                                                                                                                                       | American Journal of Medicine                  | No original data              |
| Bowsworth    | 2011 | Home blood pressure management and improved blood pressure control: results from a randomized controlled trial                                                                                                                             | Arch Intern Med                               | No original data              |
| Bove         | 2011 | Reducing cardiovascular disease risk in medically underserved urban and rural communities                                                                                                                                                  | American Heart Journal                        | No original data              |
| Bove         | 2013 | Managing hypertension in urban underserved subjects using telemedicine: A clinical trial                                                                                                                                                   | Journal of the American College of Cardiology | Insufficient data             |
| Breil        | 2019 | Acceptance of mHealth apps for self-management among people with hypertension                                                                                                                                                              | GMDS                                          | Ineligible patient population |
| Brewer       | 2023 | mHealth Intervention for Promoting Hypertension Self-management Among African American Patients Receiving Care at a Community Health Center: Formative Evaluation of the FAITH! Hypertension App                                           | JMIR Form Res                                 | No original data              |
| Brewer       | 2018 | Community-based, cluster-randomized pilot trial of a cardiovascular mHealth intervention: Rationale, design, and baseline findings of the FAITH! Trial                                                                                     | American Heart Journal                        | Insufficient data             |

|               |      |                                                                                                                                                                                       |                                                                                                                                                          |                               |
|---------------|------|---------------------------------------------------------------------------------------------------------------------------------------------------------------------------------------|----------------------------------------------------------------------------------------------------------------------------------------------------------|-------------------------------|
| Brewer        | 2018 | mHealth intervention promoting cardiovascular health among African-Americans: recruitment and baseline characteristics of a pilot study                                               | JMIR Research Protocols                                                                                                                                  | Protocol                      |
| Brook         | 2022 | Utilizing Mobile Health Units for Mass Hypertension Screening in Socially Vulnerable Communities Across Detroit                                                                       | Hypertension                                                                                                                                             | Wrong study design            |
| Brown         | 2019 | "Drugs Do Not Work on Patients Who Do Not Take Them" Can We Do Better in Patient Adherence?                                                                                           | Journal of Cardiac Failure                                                                                                                               | No original data              |
| Buckley       | 2015 | Corrections clinic                                                                                                                                                                    | Annals of Internal Medicine                                                                                                                              | No original data              |
| Buis          | 2020 | Understanding the Feasibility, Acceptability, and Efficacy of a Clinical Pharmacist-led Mobile Approach (BPTrack) to Hypertension Management: Mixed Methods Pilot Study               | Journal of Med Internet Res                                                                                                                              |                               |
| Buis          | 2017 | Text Messaging to Improve Hypertension Medication Adherence in African Americans From Primary Care and Emergency Department Settings: Results From Two Randomized Feasibility Studies | JMIR mHealth and uHealth                                                                                                                                 | Wrong comparator              |
| Buis          | 2019 | Improving Blood Pressure Among African Americans With Hypertension Using a Mobile Health Approach (the MI-BP App): Protocol for a Randomized Controlled Trial                         | JMIR Research Protocols                                                                                                                                  | Protocol                      |
| Blyler        | 2021 | Improving efficiency of the barbershop model of hypertension care for black men with virtual visits                                                                                   | Journal of the American Heart Association                                                                                                                | Wrong comparator              |
| Cardozo       | 2010 | Telemedicine for recently discharged older patients                                                                                                                                   | Telemedicine Journal & E-Health                                                                                                                          | Wrong outcomes                |
| Castelnuovo   | 2015 | Chronic care management of globesity: promoting healthier lifestyles in traditional and mHealth based settings                                                                        | Frontiers in psychology                                                                                                                                  | No original data              |
| Catov         | 2016 | Pregnancy as a window to future health: short-term costs and consequences                                                                                                             | American Journal of Obstetrics and Gynecology                                                                                                            | No original data              |
| Chad-Friedman | 2018 | Total Lifestyle Coaching: A Pilot Study Evaluating the Effectiveness of a Mind-Body and Nutrition Telephone Coaching Program for Obese Adults at a Community Health Center            | Glob Adv Health Med                                                                                                                                      | Wrong intervention            |
| Choi          | 2014 | Effectiveness of telemedicine: videoconferencing for low-income elderly with hypertension                                                                                             | Telemedicine Journal & E-Health                                                                                                                          | Ineligible patient population |
| Chowdhury     | 2018 | Effectiveness of telehealth on hypertension management and control among disparate populations-a systematic review and meta-analysis                                                  | Circulation: Cardiovascular Quality and Outcomes. Conference: American Heart Association Quality of Care and Outcomes Research Scientific Sessions, QCOR | No original data              |
| Clark         | 2020 | REMOTE HYPERTENSION MANAGEMENT USING BLOOD PRESSURE TELEMONITORING IN A RURAL AND LOW-INCOME POPULATION                                                                               | Journal of the American College of Cardiology                                                                                                            | Insufficient data             |
| Clark         | 2020 | Digital Informed Consent in a Rural and Low-Income Population                                                                                                                         | JAMA Cardiology                                                                                                                                          | Wrong outcomes                |

|           |      |                                                                                                                                                                                      |                                                                         |                               |
|-----------|------|--------------------------------------------------------------------------------------------------------------------------------------------------------------------------------------|-------------------------------------------------------------------------|-------------------------------|
| Cole      | 2017 | Community-Based, Preclinical Patient Navigation for Colorectal Cancer Screening Among Older Black Men Recruited From Barbershops: The MISTER B Trial                                 | American journal of public health                                       | Wrong outcomes                |
| Crowley   | 2016 | Practical Telemedicine for Veterans with Persistently Poor Diabetes Control: A Randomized Pilot Trial                                                                                | Telemed J E Health                                                      | No original data              |
| Daraei    | 2015 | Mobile health screening initiatives: a narrative of three unique programs in underserved populations                                                                                 | Innovation and Entrepreneurship in Health                               | No original data              |
| Dary      | 2014 | Remote monitoring in heart failure: Feasibility and results of a limited 14-day follow-up of 83 patients                                                                             | European Research in Telemedicine                                       | Ineligible patient population |
| David     | 2023 | Effect of Mobile Health Interventions on Lifestyle and Anthropometric Characteristics of Uncontrolled Hypertensive Participants: Secondary Analyses of a Randomized Controlled Trial | Healthcare Basel                                                        | Wrong patient population      |
| Davidson  | 2015 | Evaluation of an mHealth Medication Regimen Self-Management Program for African American and Hispanic Uncontrolled Hypertensives                                                     | J Pers Med                                                              | Insufficient data             |
| DeNicola  | 2020 | Connected health-enabled remote blood pressure monitoring of low-risk pregnancy in rural setting                                                                                     | Obstetrics and Gynecology                                               | Wrong outcomes                |
| Desai     | 2016 | Smartphone apps: A patient's new best friend?                                                                                                                                        | Clinical Journal of the American Society of Nephrology                  | No original data              |
| Dicianno  | 2015 | Perspectives on the evolution of mobile (mHealth) technologies and application to rehabilitation                                                                                     | Physical therapy                                                        | No original data              |
| Donahue   | 2016 | Lessons Learned From Implementing Health Coaching in The Heart Healthy Lenoir Hypertension Study                                                                                     | Progress in Community Health Partnerships-Research Education and Action | Wrong outcomes                |
| Dorsch    | 2020 | Effects of a Novel Contextual Just-In-Time Mobile App Intervention (LowSalt4Life) on Sodium Intake in Adults With Hypertension: Pilot Randomized Controlled Trial                    | JMIR mHealth and uHealth                                                | Wrong intervention            |
| Duan      | 2020 | Using goal-directed design to create a mobile health app to improve patient compliance with hypertension self-management: development and deployment                                 | JMIR mHealth and uHealth                                                | Ineligible patient population |
| Dunsmuir  | 2014 | Development of mHealth applications for pre-eclampsia triage                                                                                                                         | IEEE journal of biomedical and health informatics                       | No original data              |
| Eccher    | 2014 | A Mobile Logbook to Diagnose Masked Hypertension: a Pilot Application                                                                                                                | E-Health - for Continuity of Care                                       | Wrong outcomes                |
| Egede     | 2017 | Randomized Controlled Trial of Technology-Assisted Case Management in Low Income Adults with Type 2 Diabetes                                                                         | Diabetes Technology and Therapeutics                                    | Wrong outcomes                |
| ElHadidi  | 2020 | Evidence beyond the digital medication pill                                                                                                                                          | European Heart Journal - Cardiovascular Pharmacotherapy                 | No original data              |
| Ferdinand | 2023 | TEXT MY BP MEDS NOLA: A pilot study of text-messaging and social support to increase hypertension medication adherence                                                               | American Heart Journal                                                  | Insufficient data             |

|                       |      |                                                                                                                                                                                    |                                                    |                               |
|-----------------------|------|------------------------------------------------------------------------------------------------------------------------------------------------------------------------------------|----------------------------------------------------|-------------------------------|
| Florin                | 1971 | Heart screening in the Newark Model Cities area: a feasibility study                                                                                                               | American journal of public health                  | Wrong intervention            |
| Foley                 | 2012 | Weight gain prevention among black women in the rural community health center setting: the Shape Program                                                                           | BMC Public Health                                  | Protocol                      |
| Foley                 | 2016 | Track: A randomized controlled trial of a digital health obesity treatment intervention for medically vulnerable primary care patients                                             | Contemporary Clinical Trials                       | Protocol                      |
| Fundoiano-Hershcovitz | 2022 | Blood Pressure Monitoring as a Digital Health Tool for Improving Diabetes Clinical Outcomes: Retrospective Real-world Study                                                        | Journal of Medical Internet Research               | Insufficient data             |
| Ganti                 | 2021 | Enabling Wearable Pulse Transit Time-Based Blood Pressure Estimation for Medically Underserved Areas and Health Equity: Comprehensive Evaluation Study                             | JMIR mHealth and uHealth                           | Wrong study design            |
| Gaspar                | 2020 | Instituting video visits for hypertension control in an urban teaching practice                                                                                                    | Journal of General Internal Medicine               | Insufficient data             |
| Gerin                 | 2007 | The medication Adherence and Blood Pressure Control (ABC) trial: A multi-site randomized controlled trial in a hypertensive, multi-cultural, economically disadvantaged population | Contemporary Clinical Trials                       | Protocol                      |
| Girma                 | 2021 | Self-measured blood pressure monitoring (SBPM) during the COVID-19 pandemic                                                                                                        | Journal of General Internal Medicine               | Insufficient data             |
| Gollamudi             | 2016 | A framework for smartphone-enabled, patient-generated health data analysis                                                                                                         | PeerJ                                              | Insufficient data             |
| Gong                  | 2020 | Mobile health applications for the management of primary hypertension: A multicenter, randomized, controlled trial                                                                 | Medicine                                           | Ineligible patient population |
| Gonzalez              | 2020 | Design and methods of NYC care calls: An effectiveness trial of telephone-delivered type 2 diabetes self-management support                                                        | Contemp Clin Trials                                | Protocol                      |
| Gopalan               | 2015 | Health-specific information and communication technology use and its relationship to chronic disease status in communities on the South side of Chicago                            | Journal of General Internal Medicine               | Wrong outcomes                |
| Greer                 | 2022 | Exploring Feasibility of mHealth to Manage Hypertension in Rural Black Older Adults: A Convergent Parallel Mixed Method Study                                                      | Patient Prefer Adherence                           | Insufficient data             |
| Grobbee               | 2017 | Secondary prevention of cardiovascular disease: Unmet medical need, implementation and innovation                                                                                  | European Journal of Preventive Cardiology          | No original data              |
| Gulliford             | 2019 | Digital health intervention at older ages                                                                                                                                          | The Lancet Digital Health                          | No original data              |
| Gyselaers             | 2019 | Mobile Health Applications for Prenatal Assessment and Monitoring                                                                                                                  | Curr Pharm Des                                     | No original data              |
| Hampton               | 2012 | Recent advances in mobile technology benefit global health, research, and care                                                                                                     | JAMA - Journal of the American Medical Association | No original data              |
| Harrison              | 2013 | A randomized controlled trial of an automated telephone intervention to improve blood pressure control                                                                             | Journal of Clinical Hypertension                   | Wrong intervention            |
| Hauspurg              | 2020 | 25: The impact of race on blood pressure trajectory in the postpartum period                                                                                                       | American Journal of Obstetrics and Gynecology      | Insufficient data             |

|           |      |                                                                                                                                                                                                                                    |                                                                               |                               |
|-----------|------|------------------------------------------------------------------------------------------------------------------------------------------------------------------------------------------------------------------------------------|-------------------------------------------------------------------------------|-------------------------------|
| Heisler   | 2019 | Effectiveness of Technologically Enhanced Peer Support in Improving Glycemic Management Among Predominantly African American, Low-Income Adults With Diabetes                                                                      | Diabetes Educ                                                                 | Insufficient data             |
| Hernandez | 2020 | A Web-Based Positive Psychological Intervention to Improve Blood Pressure Control in Spanish-Speaking Hispanic/Latino Adults With Uncontrolled Hypertension: Protocol and Design for the Alegrate! Randomized Controlled Trial     | JMIR Research Protocols                                                       | Protocol                      |
| Herzallah | 2019 | Combined patient-provider engagement system and mhealth interventions improved medication adherence for minority and low-income patients with diabetes compared to mhealth only: The office-guidelines applied to practice program | Journal of General Internal Medicine                                          | Wrong outcomes                |
| Hines     | 2022 | Community Hypertension Screening and Care Referral With Blood Pressure-Measuring Kiosks, Digital Education Modalities, and Text Messages                                                                                           | American journal of hypertension                                              | No original data              |
| Hirshberg | 2019 | Text message remote monitoring reduced racial disparities in postpartum blood pressure ascertainment                                                                                                                               | American Journal of Obstetrics & Gynecology                                   | Wrong outcomes                |
| Hirshberg | 2019 | Text message remote blood pressure monitoring eliminated racial disparities in postpartum hypertension care                                                                                                                        | American Journal of Obstetrics and Gynecology                                 | Wrong outcomes                |
| Hoque     | 2017 | Understanding factors influencing the adoption of mHealth by the elderly: An extension of the UTAUT model                                                                                                                          | International Journal of Medical Informatics                                  | Ineligible patient population |
| Hudson    | 2015 | Cares (changing and advancing risk factor control through educations after stroke): A pilot trial of a transitions in care post-discharge telephone intervention for stroke patients                                               | Neurology. Conference: 67th American Academy of Neurology Annual Meeting, AAN | Protocol                      |
| Huffman   | 2017 | Improving blood pressure control and health systems with community health workers                                                                                                                                                  | JAMA - Journal of the American Medical Association                            | No original data              |
| Hussain   | 2014 | The project red chip (reducing disparities and controlling hypertension in primary care) care management intervention: An evaluation of its effectiveness & implementation                                                         | Journal of General Internal Medicine                                          | Wrong intervention            |
| Ionov     | 2021 | Value-based approach to blood pressure telemonitoring and remote counseling in hypertensive patients                                                                                                                               | Blood Pressure                                                                | Wrong study design            |
| Irewall   | 2019 | Nurse-led, telephone-based secondary preventive follow-up benefits stroke/TIA patients with low education: a randomized controlled trial sub-study                                                                                 | Trials                                                                        | Ineligible patient population |
| Islam     | 2019 | Validation and Acceptability of a Cuffless Wrist-Worn Wearable Blood Pressure Monitoring Device Among Users and Health Care Professionals: Mixed Methods Study                                                                     | JMIR Mhealth Uhealth                                                          | Wrong study design            |
| Jackson   | 2012 | Racial differences in the effect of a telephone-delivered hypertension disease management program                                                                                                                                  | Journal of General Internal Medicine                                          | No original data              |
| James     | 2017 | Participation of African Americans in e-Health and m-Health studies: a systematic review                                                                                                                                           | Telemedicine and E-Health                                                     | No original data              |

|            |      |                                                                                                                                                                                        |                                                                                  |                               |
|------------|------|----------------------------------------------------------------------------------------------------------------------------------------------------------------------------------------|----------------------------------------------------------------------------------|-------------------------------|
| Jenkins    | 2016 | Stroke patients and their attitudes toward mHealth monitoring to support blood pressure control and medication adherence                                                               | Began with 2015                                                                  | Wrong outcomes                |
| Jeong      | 2018 | Telephone Support and Telemonitoring for Low-Income Older Adults                                                                                                                       | Research in gerontological nursing                                               | Ineligible patient population |
| Jhamb      | 2015 | Disparities in Electronic Health Record Patient Portal Use in Nephrology Clinics                                                                                                       | Clinical Journal of The American Society of Nephrology: CJASN                    | Wrong study design            |
| Jindal     | 2018 | Development of mWellcare: an mHealth intervention for integrated management of hypertension and diabetes in low-resource settings                                                      | Global health action                                                             | Protocol                      |
| Jones      | 2018 | Using text messages to promote health in African-Americans: #HeartHealthyandCancerFree                                                                                                 | Ethn Health                                                                      | Wrong study design            |
| Kanaya     | 2012 | The Live Well, Be Well study: a community-based, translational lifestyle program to lower diabetes risk factors in ethnic minority and lower-socioeconomic status adults               | Am J Public Health                                                               | Wrong intervention            |
| Kaplan     | 2017 | Improving patient engagement in self-measured blood pressure monitoring using a mobile health technology                                                                               | Health Inf Sci Syst                                                              | Wrong comparator              |
| Kassar     | 2017 | Use of Telemedicine for Management of Diabetes in Correctional Facilities                                                                                                              | Telemedicine Journal & E-Health                                                  | Wrong study design            |
| Katzmarzyk | 2018 | Promoting Successful Weight Loss in Primary Care in Louisiana (PROPEL): Rationale, design and baseline characteristics                                                                 | Contemp Clin Trials                                                              | Protocol                      |
| Keegan     | 2020 | Evaluating the Impact of Telehealth-Based, Diabetes Medication Training for Community Health Workers on Glycemic Control                                                               | J Pers Med                                                                       | Insufficient data             |
| Kerby      | 2011 | Adherence to comprehensive interventions for management of uncontrolled hypertension                                                                                                   | Journal of Clinical Hypertension                                                 | Insufficient data             |
| Keyserling | 2016 | A community-based lifestyle and weight loss intervention promoting a Mediterranean-style diet pattern evaluated in the stroke belt of North Carolina: the Heart Healthy Lenoir Project | BMC Public Health                                                                | Wrong intervention            |
| Kim        | 2023 | The ACTIVATE Digital Health Pilot Program for Diabetes and Hypertension in an Underserved and Rural Community                                                                          | Applied clinical informatics                                                     | Wrong study design            |
| Kitsiou    | 2017 | Development of an innovative mHealth platform for remote physical activity monitoring and health coaching of cardiac rehabilitation patients                                           | 2017 IEEE EMBS International Conference on Biomedical & Health Informatics (BHI) | Wrong outcomes                |
| Kothapalli | 2012 | Factors affecting frequency of patient use of internet-based telemedicine system to manage chronic cardiovascular disease risk conditions                                              | Journal of the American College of Cardiology                                    | Wrong study design            |
| Kothapalli | 2013 | Factors affecting frequency of patient use of Internet-based telemedicine to manage cardiovascular disease risk                                                                        | Journal of Telemedicine & Telecare                                               | Wrong outcomes                |
| Kumar      | 2015 | A content analysis of smartphone-based applications for hypertension management                                                                                                        | Journal of the American Society of Hypertension                                  | Wrong outcomes                |
| Landry     | 2013 | African American community members sustain favorable blood pressure outcomes through 12-month telephone motivational interviewing (MI) maintenance                                     | FASEB Journal. Conference: Experimental Biology                                  | Insufficient data             |

|             |      |                                                                                                                                                                                                                               |                                                      |                               |
|-------------|------|-------------------------------------------------------------------------------------------------------------------------------------------------------------------------------------------------------------------------------|------------------------------------------------------|-------------------------------|
| Lee         | 2022 | Early Impact of Collaborative Remote Patient Monitoring (C-RPM) for Hypertension on Underserved Populations during the COVID19 Pandemic: A Multicenter Retrospective Observational Study                                      | Journal of the American College of Clinical Pharmacy | Insufficient data             |
| Lee         | 2016 | Using mHealth in Social Work Practice with Low-Income Hispanic Patients                                                                                                                                                       | Health & social work                                 | No original data              |
| Lefler      | 2018 | Feasibility and engagement with m-health monitoring in rural-dwelling older adults with heart failure: a pilot study                                                                                                          | Circulation                                          | Wrong outcomes                |
| Lewinski    | 2019 | Addressing Diabetes and Poorly Controlled Hypertension: Pragmatic mHealth Self-Management Intervention                                                                                                                        | Journal of Medical Internet Research                 | Wrong study design            |
| Li          | 2015 | Pilot Test of a Culturally Sensitive Hypertension Management Intervention Protocol for Older Chinese Immigrants Chinese Medicine as Longevity Modality                                                                        | Cin-Computers Informatics Nursing                    | Wrong outcomes                |
| Lin         | 2020 | The clinical outcomes and effectiveness of mHealth interventions for diabetes and hypertension: a systematic review and meta-analysis                                                                                         | medRxiv                                              | Ineligible patient population |
| Liyange-Don | 2023 | Association between Frequency of Home Blood Pressure Measurement and Subsequent Blood Pressure Outcomes among Patients Enrolled in a Remote Patient Monitoring Program for Hypertension                                       | Journal of General Internal Medicine                 | Insufficient data             |
| Logan       | 2013 | Transforming hypertension management using mobile health technology for telemonitoring and self-care support                                                                                                                  | Canadian Journal of Cardiology                       | No original data              |
| Lokker      | 2021 | Feasibility of a Web-Based Platform (Trial My App) to Efficiently Conduct Randomized Controlled Trials of mHealth Apps For Patients With Cardiovascular Risk Factors: Protocol For Evaluating an mHealth App for Hypertension | JMIR Research Protocols                              | Protocol                      |
| Lu          | 2019 | Interactive mobile health intervention and blood pressure management in adults: a meta-analysis of randomized controlled trials                                                                                               | Hypertension                                         | No original data              |
| Lynch       | 2014 | A self-management intervention for African Americans with comorbid diabetes and hypertension: a pilot randomized controlled trial                                                                                             | Prev Chronic Dis                                     | Wrong intervention            |
| Maciejewski | 2014 | Do the benefits of participation in a hypertension self-management trial persist after patients resume usual care?                                                                                                            | Circulation. Cardiovascular Quality & Outcomes       | No original data              |
| Madsen      | 2008 | Health-related quality of life (SF-36) during telemonitoring of home blood pressure in hypertensive patients: A randomized, controlled study                                                                                  | Blood Pressure                                       | Ineligible patient population |
| Mainsbridge | 2018 | Blood Pressure Response to Interrupting Workplace Sitting Time With Non-Exercise Physical Activity: Results of a 12-Month Cohort Study                                                                                        | Journal of Occupational & Environmental Medicine     | Ineligible patient population |
| Mallow      | 2018 | The effectiveness of mI SMART: A nurse practitioner led technology intervention for multiple chronic conditions in primary care                                                                                               | Int J Nurs Sci                                       | Wrong study design            |
| Mann        | 2013 | Development of DASH Mobile: a mHealth lifestyle change intervention for the management of hypertension                                                                                                                        | Studies in Health Technology and Informatics         | Insufficient data             |
| Mann        | 2014 | Dietary approaches to stop hypertension: lessons learned from a case study on the development of an mHealth behavior change system                                                                                            | JMIR mHealth and uHealth                             | No original data              |
| Marcolino   | 2018 | The Impact of mHealth Interventions: Systematic Review of Systematic Reviews                                                                                                                                                  | JMIR mHealth and uHealth                             | No original data              |



|              |      |                                                                                                                                                                                                                                      |                                                                                                                                          |                    |
|--------------|------|--------------------------------------------------------------------------------------------------------------------------------------------------------------------------------------------------------------------------------------|------------------------------------------------------------------------------------------------------------------------------------------|--------------------|
| Margolis     | 2022 | Comparing Pharmacist-Led Telehealth Care and Clinic-Based Care for Uncontrolled High Blood Pressure: The Hyperlink 3 Pragmatic Cluster-Randomized Trial                                                                              | Hypertension                                                                                                                             | No original data   |
| Margolis     | 2020 | Cardiovascular Events and Costs With Home Blood Pressure Telemonitoring and Pharmacist Management for Uncontrolled Hypertension                                                                                                      | Hypertension                                                                                                                             | Wrong outcomes     |
| Martin       | 2011 | Medication adherence among rural, low-income hypertensive adults: a randomized trial of a multimedia community-based intervention                                                                                                    | American Journal of Health Promotion                                                                                                     | Wrong outcomes     |
| McCarroll    | 2017 | Effectiveness of mobile health (mHealth) interventions for promoting healthy eating in adults: A systematic review                                                                                                                   | Preventive Medicine                                                                                                                      | No original data   |
| McGillicuddy | 2020 | Exploratory analysis of the impact of an mhealth medication adherence intervention on tacrolimus trough concentration variability: post hoc results of a randomized controlled trial                                                 | Annals of Pharmacotherapy                                                                                                                | Wrong outcomes     |
| McLaughlin   | 2010 | Heart failure: Telephone monitoring improves outcomes in patients with CHF                                                                                                                                                           | Nature Reviews Cardiology                                                                                                                | No original data   |
| Melville     | 2015 | Next-generation cloud-based blood pressure devices in chronic disease management: A direct intraarterial pressure calibration of an oscillometric wrist cuff device for clinically reliable and accurate blood pressure measurements | Canadian Journal of Cardiology                                                                                                           | Wrong outcomes     |
| Memon        | 2010 | Patient centered care: Baseline demographics data from a stage I hypertension clinical trial                                                                                                                                         | Circulation: Cardiovascular Quality and Outcomes. Conference: Quality of Care and Outcomes Research in Cardiovascular Disease and Stroke | Wrong outcomes     |
| Mertens      | 2017 | Mobile Technology Improves Therapy-Adherence Rates in Elderly Patients Undergoing Rehabilitation-A Crossover Design Study                                                                                                            | Advances in Human Factors and Ergonomics in Healthcare                                                                                   | Wrong outcomes     |
| Meurer       | 2020 | Reach out behavioral intervention for hypertension initiated in the emergency department connecting multiple health systems: study protocol for a randomized control trial                                                           | Trials [Electronic Resource]                                                                                                             | Protocol           |
| Michalakeas  | 2020 | Mobile phones and applications in the management of patients with arterial hypertension                                                                                                                                              | American Journal of Cardiovascular Disease                                                                                               | No original data   |
| Milani       | 2016 | The Role of Technology in Chronic Disease Care                                                                                                                                                                                       | Progress in Cardiovascular Diseases                                                                                                      | No original data   |
| Mirsky       | 2020 | Chronic disease management in the COVID-19 era                                                                                                                                                                                       | American Journal of Managed Care                                                                                                         | No original data   |
| Misher       | 2020 | Employer-Sponsored Wellness Programs for Hypertension and Dyslipidemia in a 2-Hospital Health System                                                                                                                                 | Am Health Drug Benefits                                                                                                                  | Wrong intervention |
| Morawski     | 2017 | Rationale and design of the Medication adherence Improvement Support App For Engagement-Blood Pressure (MedISAFE-BP) trial                                                                                                           | American Heart Journal                                                                                                                   | Protocol           |
| Nct          | 2016 | mHealth for Diabetes Adherence Support                                                                                                                                                                                               | Clinicaltrials.gov                                                                                                                       | Protocol           |
| Nct          | 2019 | A Pharmacist Intervention for Monitoring and Treating Hypertension Using Bidirectional Texting                                                                                                                                       | Clinicaltrials.gov                                                                                                                       | Protocol           |
| Nelson       | 2014 | Peer Support for Achieving Independence in Diabetes (Peer-AID): design, methods and baseline characteristics of a randomized controlled trial of community health worker assisted diabetes self-management support                   | Contemp Clin Trials                                                                                                                      | Protocol           |

|               |      |                                                                                                                                                                                       |                                                                                 |                               |
|---------------|------|---------------------------------------------------------------------------------------------------------------------------------------------------------------------------------------|---------------------------------------------------------------------------------|-------------------------------|
| Nicklas       | 2016 | Participant feedback and iterative improvements to a mobile health program for postpartum women at elevated cardiometabolic risk                                                      | Journal of General Internal Medicine                                            | Wrong outcomes                |
| NnodimOpara   | 2023 | Linkage, Empowerment, and Access to Prevent Hypertension: A Novel Program to Prevent Hypertension and Reduce Cardiovascular Health Disparities in Detroit, Michigan                   | American Journal of Hypertension                                                | No original data              |
| Oclaman       | 2023 | The Association Between Mobile App Use and Change in Functional Capacity Among Cardiac Rehabilitation Participants: Cohort Study                                                      | JMIR Cardiology                                                                 | Wrong comparator              |
| Oh            | 2022 | Effect of an Integrative Mobile Health Intervention in Patients With Hypertension and Diabetes: Crossover Study                                                                       | JMIR MHealth UHealth                                                            | Ineligible patient population |
| Olfert        | 2019 | Feasibility of a mHealth Approach to Nutrition Counseling in an Appalachian State                                                                                                     | Journal of Personalized Medicine                                                | Wrong outcomes                |
| Omboni        | 2019 | Connected health in hypertension management                                                                                                                                           | Frontiers in cardiovascular medicine                                            | No original data              |
| Or            | 2016 | A 3-Month Randomized Controlled Pilot Trial of a Patient-Centered, Computer-Based Self-Monitoring System for the Care of Type 2 Diabetes Mellitus and Hypertension                    | Journal of Medical Systems                                                      | Ineligible patient population |
| Otero-Sabogal | 2011 | Physician-community health worker partnering to support diabetes self-management in primary care                                                                                      | Qual Prim Care                                                                  | Wrong intervention            |
| Padwal        | 2019 | Designing interventions for blood pressure control in challenging settings: Active not passive intervention is needed                                                                 | Journal of Clinical Hypertension                                                | No original data              |
| Palmas        | 2008 | Telemedicine home blood pressure measurements and progression of albuminuria in elderly people with diabetes                                                                          | Hypertension                                                                    | Wrong outcomes                |
| Palmas        | 2014 | Results of the northern Manhattan diabetes community outreach project: a randomized trial studying a community health worker intervention to improve diabetes care in Hispanic adults | Diabetes Care                                                                   | Wrong intervention            |
| Parati        | 2009 | Home blood pressure telemonitoring improves hypertension control in general practice. the TeleBPCare study                                                                            | Journal of hypertension                                                         | Ineligible patient population |
| Pare          | 2007 | Systematic review of home telemonitoring for chronic diseases: the evidence base                                                                                                      | Journal of the American Medical Informatics Association                         | No original data              |
| Parola        | 2022 | Assessing Patient Engagement and Participation in Remote Patient Monitoring Program for Hypertension                                                                                  | Journal of General Internal Medicine                                            | Insufficient data             |
| Pemu          | 2019 | Achieving Health Equity with e-Healthstrides: Patient Perspectives of a Consumer Health Information Technology Application                                                            | Ethnicity & disease                                                             | Wrong study design            |
| Perdigao      | 2020 | Postpartum blood pressure trends are impacted by race and BMI                                                                                                                         | Pregnancy Hypertension-an International Journal of Womens Cardiovascular Health | Insufficient data             |
| Peters        | 2017 | Assessing the Utility of a Novel SMS- and Phone-Based System for Blood Pressure Control in Hypertensive Patients: Feasibility Study                                                   | JMIR Cardio                                                                     | Wrong study design            |

|               |      |                                                                                                                                                                                                          |                                                    |                               |
|---------------|------|----------------------------------------------------------------------------------------------------------------------------------------------------------------------------------------------------------|----------------------------------------------------|-------------------------------|
| Piette        | 2011 | Clinical complexity and the effectiveness of an intervention for depressed diabetes patients                                                                                                             | Chronic Illn                                       | Wrong intervention            |
| Piette        | 2015 | Mobile Health Devices as Tools for Worldwide Cardiovascular Risk Reduction and Disease Management                                                                                                        | Circulation                                        | No original data              |
| Pletcher      | 2020 | The PCORnet Blood Pressure Control Laboratory: A Platform for Surveillance and Efficient Trials                                                                                                          | Circulation. Cardiovascular Quality & Outcomes     | No original data              |
| Poblete       | 2023 | Digitally Based Blood Pressure Self-Monitoring Program That Promotes Hypertension Self-Management and Health Education Among Patients With Low-Income: Usability Study                                   | JMIR Human Factors                                 | Wrong comparator              |
| Post          | 2013 | New media use by patients who are homeless: the potential of mHealth to build connectivity                                                                                                               | Journal of Medical Internet Research               | Wrong outcomes                |
| Prabhakaran   | 2019 | Effectiveness of an mHealth-based electronic decision support system for integrated management of chronic conditions in primary care: the mWellcare cluster-randomized controlled trial                  | Circulation                                        | Ineligible patient population |
| Prendergast   | 2020 | Preliminary Data from a Randomized Controlled Trial for a Hypertension Education and Empowerment Intervention (TOUCHED) in an Urban, Academic Emergency Department: Opportunities in the era of COVID-19 | Journal of the National Medical Association        | Protocol                      |
| Raber         | 2019 | Health Insurance and Mobile Health Devices: Opportunities and Concerns                                                                                                                                   | JAMA - Journal of the American Medical Association | No original data              |
| Ramirez       | 2016 | Assessing the Use of Mobile Health Technology by Patients: An Observational Study in Primary Care Clinics                                                                                                | JMIR mHealth and uHealth                           | Wrong outcomes                |
| Randall       | 2019 | The effects of telehealth on the frequency of primary care clinic visits                                                                                                                                 | Journal of General Internal Medicine               | Wrong outcomes                |
| Rehman        | 2017 | Mobile Health (mHealth) Technology for the Management of Hypertension and Hyperlipidemia: Slow Start but Loads of Potential                                                                              | Current Atherosclerosis Reports                    | No original data              |
| Reidpath      | 2012 | Community-based blood pressure measurement by non-health workers using electronic devices: a validation study                                                                                            | Glob Health Action                                 | Ineligible patient population |
| Rhoads        | 2017 | Exploring implementation of m-health monitoring in postpartum women with hypertension                                                                                                                    | Telemedicine and E-Health                          | Wrong outcomes                |
| Rich          | 2017 | Implementation-effectiveness trial of an ecological intervention for physical activity in ethnically diverse low income senior centers                                                                   | BMC Public Health                                  | Protocol                      |
| Rivera-Romero | 2018 | Mobile Health Solutions for Hypertensive Disorders in Pregnancy: Scoping Literature Review                                                                                                               | JMIR mHealth and uHealth                           | No original data              |
| Roess         | 2017 | The promise, growth, and reality of mobile health - Another data-free zone                                                                                                                               | New England Journal of Medicine                    | No original data              |
| Siafi         | 2022 | Blood Pressure Management with the Esh Care App - Preliminary Results                                                                                                                                    | Journal of hypertension                            | Ineligible patient population |

|              |      |                                                                                                                                                                                                              |                                                                                |                               |
|--------------|------|--------------------------------------------------------------------------------------------------------------------------------------------------------------------------------------------------------------|--------------------------------------------------------------------------------|-------------------------------|
| Salter       | 2014 | Implementation of telecommunication stroke rehabilitation within stroke early supported discharge team (ESD)                                                                                                 | International Journal of Stroke                                                | Ineligible patient population |
| Samuel-Hodge | 2013 | A pilot study comparing two weight loss maintenance interventions among low-income, mid-life women                                                                                                           | BMC Public Health                                                              | Wrong intervention            |
| Samuel-Hodge | 2020 | Strengthening community-clinical linkages to reduce cardiovascular disease risk in rural NC: feasibility phase of the CHANGE study                                                                           | BMC Public Health                                                              | Wrong intervention            |
| Saner        | 2019 | Digital health implementation: How to overcome the barriers?                                                                                                                                                 | European Journal of Preventive Cardiology                                      | No original data              |
| Santo        | 2019 | The potential of mHealth applications in improving resistant hypertension self-assessment, treatment and control                                                                                             | Current Hypertension Reports                                                   | No original data              |
| Schoenthaler | 2020 | Development and Evaluation of a Tailored Mobile Health Intervention to Improve Medication Adherence in Black Patients With Uncontrolled Hypertension and Type 2 Diabetes: Pilot Randomized Feasibility Trial | JMIR mHealth and uHealth                                                       | Insufficient data             |
| Senecal      | 2018 | Usage of a Digital Health Workplace Intervention Based on Socioeconomic Environment and Race: Retrospective Secondary Cross-Sectional Study                                                                  | J Med Internet Res                                                             | Protocol                      |
| Shah         | 2015 | Telemonitoring of blood pressure in low-income African American patients with congestive heart failure                                                                                                       | Hypertension. Conference: American Heart Association's Council on Hypertension | Insufficient data             |
| Shah         | 2021 | Identifying features of successful mobile health interventions for hypertension self-management in populations with digital barriers: A qualitative comparative analysis                                     | Journal of General Internal Medicine                                           | No original data              |
| Shaw         | 2013 | Development of a theoretically driven mHealth text messaging application for sustaining recent weight loss                                                                                                   | JMIR mHealth and uHealth                                                       | Wrong outcomes                |
| Shea         | 2006 | A randomized trial comparing telemedicine case management with usual care in older, ethnically diverse, medically underserved patients with diabetes mellitus                                                | Journal of the American Medical Informatics Association                        | No original data              |
| Shea         | 2007 | The Informatics for Diabetes and Education Telemedicine (IDEATel) project                                                                                                                                    | Transactions of the American Clinical and Climatological Association           | No original data              |
| Shea         | 2013 | Social impact analysis of the effects of a telemedicine intervention to improve diabetes outcomes in an ethnically diverse, medically underserved population: findings from the IDEATel Study                | Am J Public Health                                                             | Insufficient data             |
| Sieverdes    | 2013 | mHealth medication and blood pressure self-management program in Hispanic hypertensives: a proof of concept trial                                                                                            | Smart Homecare Technology and TeleHealth                                       | Insufficient data             |
| Sieverdes    | 2017 | Formative evaluation on cultural tailoring breathing awareness meditation smartphone apps to reduce stress and blood pressure                                                                                | Began with 2015                                                                | Wrong study design            |
| Singh-Franco | 2013 | Improvement in surrogate endpoints by a multidisciplinary team in a mobile clinic serving a low-income, immigrant minority population in South Florida                                                       | Journal of Health Care for the Poor & Underserved                              | Wrong intervention            |
| Skolarus     | 2023 | Reach Out Emergency Department: A Randomized Factorial Trial to Determine the Optimal Mobile Health Components to Reduce Blood Pressure                                                                      | Circulation Cardiovascular Quality and Outcomes                                | Wrong study design            |

|            |      |                                                                                                                                                                                                                                          |                                                            |                               |
|------------|------|------------------------------------------------------------------------------------------------------------------------------------------------------------------------------------------------------------------------------------------|------------------------------------------------------------|-------------------------------|
| Song       | 2013 | Mobile clinic in Massachusetts associated with cost savings from lowering blood pressure and emergency department use                                                                                                                    | Health Affairs                                             | Wrong intervention            |
| Spiegelman | 2020 | 430: Remote postpartum blood pressure surveillance for hypertensive disorders of pregnancy: a randomized clinical trial                                                                                                                  | American Journal of Obstetrics and Gynecology              | Wrong outcomes                |
| Spring     | 2018 | Multicomponent mHealth intervention for large, sustained change in multiple diet and activity risk behaviors: the make better choices 2 randomized controlled trial                                                                      | Journal of Medical Internet Research                       | Wrong outcomes                |
| Spruill    | 2015 | Comparative effectiveness of home blood pressure telemonitoring (HBPTM) plus nurse case management versus HBPTM alone among Black and Hispanic stroke survivors: study protocol for a randomized controlled trial                        | Trials [Electronic Resource]                               | Protocol                      |
| Steinberg  | 2019 | The Effect of a Digital Behavioral Weight Loss Intervention on Adherence to the Dietary Approaches to Stop Hypertension (DASH) Dietary Pattern in Medically Vulnerable Primary Care Patients: Results from a Randomized Controlled Trial | J Acad Nutr Diet                                           | Wrong intervention            |
| Steinhubl  | 2015 | The emerging field of mobile health                                                                                                                                                                                                      | Science translational medicine                             | No original data              |
| Taber      | 2018 | Pharmacist-led, technology-assisted study to improve medication safety, cardiovascular risk factor control, and racial disparities in kidney transplant recipients                                                                       | JACCP Journal of the American College of Clinical Pharmacy | Wrong study design            |
| Taylor     | 2020 | Preventing Cardiovascular Disease Among Urban African Americans With a Mobile Health App (the MOYO App): Protocol for a Usability Study                                                                                                  | JMIR Research Protocols                                    | Protocol                      |
| Thangada   | 2018 | The emerging role of mobile-health applications in the management of hypertension                                                                                                                                                        | Current Cardiology Reports                                 | No original data              |
| Thomas     | 2016 | Mobile Health Technology Can Objectively Capture Physical Activity (PA) Targets Among African-American Women Within Resource-Limited Communities-the Washington, D.C. Cardiovascular Health and Needs Assessment                         | J Racial Ethn Health Disparities                           | Wrong intervention            |
| Threatt    | 2017 | Telehealth for diabetes self-management education and support in an underserved, free clinic population: A pilot study                                                                                                                   | Journal of the American Pharmacists Association            | Insufficient data             |
| Towfighi   | 2021 | Effect of a Coordinated Community and Chronic Care Model Team Intervention vs Usual Care on Systolic Blood Pressure in Patients With Stroke or Transient Ischemic Attack: The SUCCEED Randomized Clinical Trial                          | JAMA Netw Open                                             | Wrong intervention            |
| Tuot       | 2015 | The Kidney Awareness Registry and Education (KARE) study: protocol of a randomized controlled trial to enhance provider and patient engagement with chronic kidney disease                                                               | BMC Nephrology                                             | Protocol                      |
| Turner     | 2021 | Sharing patient-generated data with healthcare providers: findings from a 2019 national survey                                                                                                                                           | Journal of the American Medical Informatics Association    | Wrong outcomes                |
| Ueda       | 2017 | Effects of a home blood pressure monitoring by mobile phone-based self management support system in mild hypertension: the Katsuragi study                                                                                               | Journal of Hypertension                                    | Ineligible patient population |
| Ueda       | 2020 | Effects of a home blood pressure monitoring by mobile phone-based and health service (continuous antihypertensive treatment) in mild hypertension : the wakayama health promotion study                                                  | Atherosclerosis                                            | Ineligible patient population |

|             |      |                                                                                                                                                                 |                                                                              |                               |
|-------------|------|-----------------------------------------------------------------------------------------------------------------------------------------------------------------|------------------------------------------------------------------------------|-------------------------------|
| Val Overton | 2021 | Mobile Health Intervention to Close the Guidelines-To-Practice Gap in Hypertension Treatment: Protocol for the mGlide Randomized Controlled Trial               |                                                                              | Protocol                      |
| Vandenberk  | 2019 | Relationship between adherence to remote monitoring and patient characteristics: observational study in women with pregnancy-induced hypertension               | JMIR mHealth and uHealth                                                     | Ineligible patient population |
| Vasti       | 2020 | Recruiting Student Health Coaches to Improve Digital Blood Pressure Management: Randomized Controlled Pilot Study                                               | JMIR Form Res                                                                | Wrong comparator              |
| Vaughan     | 2023 | Implementation and Evaluation of a mHealth-Based Community Health Worker Feedback Loop for Hispanics with and at Risk for Diabetes                              | Journal of General Internal Medicine                                         | No original data              |
| Verdejo     | 2015 | Heart Failure in Rural Communities                                                                                                                              | Heart Failure Clinics                                                        | No original data              |
| Vilme       | 2019 | Using Telehealth to Disseminate Primary, Secondary, and Tertiary CVD Interventions to Rural Populations                                                         | Current Hypertension Reports                                                 | No original data              |
| Vo          | 2019 | Patients perceptions of mHealth apps: meta-ethnographic review of qualitative studies                                                                           | JMIR mHealth and uHealth                                                     | No original data              |
| Wang        | 2017 | A systematic review of application and effectiveness of mHealth interventions for obesity and diabetes treatment and self-management                            | Advances in Nutrition                                                        | No original data              |
| Wang        | 2021 | Telemedicine in the management of hypertension: Evolving technological platforms for blood pressure telemonitoring                                              | Journal of Clinical Hypertension                                             | No original data              |
| Weerahandi  | 2020 | A Mobile Health Coaching Intervention for Controlling Hypertension: Single-Arm Pilot Pre-Post Study                                                             | JMIR Form Res                                                                | Wrong study design            |
| Welsh       | 2016 | Strategies in Development of an mHealth Technology for Low Socioeconomic Groups in Free Healthcare Clinics                                                      | CIN: Computers, Informatics, Nursing                                         | Wrong intervention            |
| Whit        | 2020 | Reach Out: Recruitment in a multicomponent, mobile health, behavioral intervention to reduce blood pressure in the Emergency Department patient population      | Journal of Stroke and Cerebrovascular Diseases                               | Protocol                      |
| White       | 2011 | Home blood pressure monitoring as an intervention to control hypertension                                                                                       | Archives of Internal Medicine                                                | No original data              |
| Whitfield   | 2020 | Adapting reach out: A mobile health intervention trial, in response to the coronavirus pandemic                                                                 | Annals of Neurology                                                          | Wrong outcomes                |
| Wilber      | 1972 | Hypertension--a community problem                                                                                                                               | American Journal of Medicine                                                 | Wrong intervention            |
| Xiong       | 2018 | Effectiveness of mHealth Interventions in Improving Medication Adherence Among People with Hypertension: a Systematic Review                                    | Current Hypertension Reports                                                 | No original data              |
| Yun         | 2020 | Efficacy of an electronic health management program for patients with cardiovascular risk: randomized controlled trial                                          | Journal of Medical Internet Research                                         | Ineligible patient population |
| Zanowiak    | 2019 | A community health worker-led health education and coaching intervention improves hypertension control among south Asian primary care patients in New York city | Circulation. Conference: American Heart Association Scientific Sessions, AHA | Wrong intervention            |

|          |      |                                                                                                                                                   |                                                                              |                    |
|----------|------|---------------------------------------------------------------------------------------------------------------------------------------------------|------------------------------------------------------------------------------|--------------------|
| Zheng    | 2020 | One-year Patterns of Home Blood Pressure Monitoring Using Consumer-purchased Wireless Devices in the Health Eheart Study                          | Circulation. Conference: American Heart Association Scientific Sessions, AHA | Wrong study design |
| Zoellner | 2011 | H.U.B city steps: Methods and early findings from a community-based participatory research trial to reduce blood pressure among african americans | International Journal of Behavioral Nutrition and Physical Activity          | Wrong intervention |
| Zullig   | 2015 | Patient-reported medication adherence barriers among veterans affairs patients with cardiovascular risk factors                                   | Journal of General Internal Medicine                                         | Wrong intervention |
| Zullig   | 2018 | Changing CHANGE: adaptations of an evidence-based telehealth cardiovascular disease risk reduction intervention                                   | Translational Behavioral Medicine                                            | Wrong outcomes     |

**eTable 5.** Excluded studies that were eliminated from the Citation Chasing with corresponding rationale

| <b>First Authors Last Name</b> | <b>Year</b> | <b>Title</b>                                                                                                                                                                                               | <b>Journal</b>                                   | <b>Reason for Exclusion</b>   |
|--------------------------------|-------------|------------------------------------------------------------------------------------------------------------------------------------------------------------------------------------------------------------|--------------------------------------------------|-------------------------------|
| Baig                           | 2015        | Picture Good Health: A Church-Based Self-Management Intervention Among Latino Adults with Diabetes                                                                                                         | Journal of general internal medicine             | Wrong intervention            |
| Bobrow                         | 2016        | Mobile Phone Text Messages to Support Treatment Adherence in Adults with High Blood Pressure (SMS-Text Adherence Support [StAR]): A Single-Blind, Randomized Trial                                         | Circulation                                      | Ineligible patient population |
| Bosworth                       | 2011        | Home blood pressure management and improved blood pressure control: results from a randomized controlled trial                                                                                             | Archives of internal medicine                    | No original data              |
| Bove                           | 2011        | Reducing cardiovascular disease risk in medically underserved urban and rural communities                                                                                                                  | American heart journal                           | No original data              |
| Buis                           | 2020        | Understanding the Feasibility, Acceptability, and Efficacy of a Clinical Pharmacist-led Mobile Approach (BPTrack) to Hypertension Management: Mixed Methods Pilot Study                                    | Journal of medical Internet research             | Insufficient Data             |
| Carter                         | 2015        | Cluster-Randomized Trial of a Physician/Pharmacist Collaborative Model to Improve Blood Pressure Control                                                                                                   | Circulation. Cardiovascular quality and outcomes | Wrong intervention            |
| Cena                           | 2016        | A multicomponent quality improvement intervention to improve blood pressure and reduce racial disparities in rural primary care practices                                                                  | Journal of clinical hypertension                 | Wrong study design            |
| Chow                           | 2015        | Effect of Lifestyle-Focused Text Messaging on Risk Factor Modification in Patients With Coronary Heart Disease: A Randomized Clinical Trial                                                                | JAMA                                             | Ineligible patient population |
| Collins                        | 2019        | Efficacy of a multi-component intervention to promote physical activity among Latino adults: A randomized controlled trial                                                                                 | Preventive medicine reports                      | Insufficient data             |
| Contreras                      | 2018        | Specific hypertension smartphone application to improve medication adherence in hypertension: a cluster-randomized trial                                                                                   | Current medical research and opinion             | Ineligible patient population |
| Davidson                       | 2015        | Evaluation of an mHealth Medication Regimen Self-Management Program for African American and Hispanic Uncontrolled Hypertensives                                                                           | Journal of personalized medicine                 | Insufficient data             |
| Ewald                          | 2006        | Relationship between the frequency of blood pressure self-measurement and blood pressure reduction with antihypertensive therapy : results of the OLMETEL (OLMEsartan TELEmonitoring blood pressure) study | Clinical drug investigation                      | Ineligible patient population |
| Field                          | 2002        | Telemedicine and remote patient monitoring                                                                                                                                                                 | JAMA                                             | Insufficient data             |
| Frie                           | 2020        | Effectiveness of a self-regulation intervention for weight loss: A randomized controlled trial                                                                                                             | British journal of health psychology             | Ineligible patient population |
| Friedman                       | 1996        | A Telecommunications System for Monitoring and Counseling Patients with Hypertension: Impact on Medication Adherence and Blood Pressure Control                                                            | American Journal of Hypertension                 | Wrong intervention            |
| Gonzalez-Sanchez               | 2019        | Using a smartphone app in changing cardiovascular risk factors: A randomized controlled trial (EVIDENT II study)                                                                                           | International journal of medical informatics     | Ineligible patient population |



|                 |      |                                                                                                                                                                             |                                                                                                                                                                            |                               |
|-----------------|------|-----------------------------------------------------------------------------------------------------------------------------------------------------------------------------|----------------------------------------------------------------------------------------------------------------------------------------------------------------------------|-------------------------------|
| Green           | 2008 | Effectiveness of Home Blood Pressure Monitoring, Web Communication, and Pharmacist Care on Hypertension Control: A Randomized Controlled Trial                              | JAMA                                                                                                                                                                       | Ineligible patient population |
| Hachsmann       | 2021 | Effects of a 2-Year Primary Care Lifestyle Intervention on Cardiometabolic Risk Factors: A Cluster-Randomized Trial                                                         | Circulation                                                                                                                                                                | Wrong intervention            |
| Hicks           | 2008 | Impact of Computerized Decision Support on Blood Pressure Management and Control: A Randomized Controlled Trial                                                             | Journal of general internal medicine                                                                                                                                       | Wrong outcomes                |
| Kes             | 2021 | The effect of nurse-led telephone support on adherence to blood pressure control and drug treatment in individuals with primary hypertension: A randomized controlled study | International journal of nursing practice                                                                                                                                  | Ineligible patient population |
| Kumanyika       | 2018 | Two-Year Results of Think Health! Vive Saludable!: A Primary Care Weight-Management Trial                                                                                   | Obesity                                                                                                                                                                    | Wrong intervention            |
| Liang           | 2015 | Behavioral support intervention for uncontrolled hypertension: a complier average causal effect (CACE) analysis                                                             | Medical care                                                                                                                                                               | Wrong outcomes                |
| Logan           | 2012 | Effect of Home Blood Pressure Telemonitoring With Self-Care Support on Uncontrolled Systolic Hypertension in Diabetics                                                      | Hypertension                                                                                                                                                               | Wrong study design            |
| Magid           | 2011 | A multimodal blood pressure control intervention in 3 healthcare systems                                                                                                    | The American journal of managed care                                                                                                                                       | Insufficient data             |
| McGillicuddy    | 2015 | Sustainability of improvements in medication adherence through a mobile health intervention                                                                                 | Progress in transplantation                                                                                                                                                | Insufficient data             |
| McManus         | 2010 | Telemonitoring and self-management in the control of hypertension (TASMINH2): a randomised controlled trial                                                                 | Lancet (London, England)                                                                                                                                                   | Ineligible patient population |
| McManus         | 2021 | Home and Online Management and Evaluation of Blood Pressure (HOME BP) using a digital intervention in poorly controlled hypertension: randomised controlled trial           | BMJ (Clinical research ed.)                                                                                                                                                | Ineligible patient population |
| Mehta           | 2019 | Electronic Pill Bottles or Bidirectional Text Messaging to Improve Hypertension Medication Adherence (Way 2 Text): a Randomized Clinical Trial                              | Journal of general internal medicine                                                                                                                                       | Wrong intervention            |
| Park            | 2021 | Adherence to Telemonitoring Therapy for Medicaid Patients With Hypertension: Case Study                                                                                     | Journal of medical Internet research                                                                                                                                       | Wrong study design            |
| Philis-Tsimikas | 2014 | Dulce Mothers: an intervention to reduce diabetes and cardiovascular risk in Latinas after gestational diabetes                                                             | Translational behavioral medicine                                                                                                                                          | Wrong intervention            |
| Rogers          | 2001 | Home Monitoring Service Improves Mean Arterial Pressure in Patients with Essential Hypertension: A Randomized, Controlled Trial                                             | Annals of internal medicine                                                                                                                                                | Insufficient data             |
| Santamore       | 2007 | Using a Telemedicine System to Decrease Cardiovascular Disease Risk in an Underserved Population: Design, Use, and Interim Results                                          | Annual International Conference of the IEEE Engineering in Medicine and Biology Society. IEEE Engineering in Medicine and Biology Society. Annual International Conference | Insufficient data             |

|              |      |                                                                                                                                                                                                                         |                                            |                               |
|--------------|------|-------------------------------------------------------------------------------------------------------------------------------------------------------------------------------------------------------------------------|--------------------------------------------|-------------------------------|
| Schoenthaler | 2019 | Development and Evaluation of a Tailored Mobile Health Intervention to Improve Medication Adherence in Black Patients With Uncontrolled Hypertension and Type 2 Diabetes: Pilot Randomized Feasibility Trial (Preprint) | NA                                         | Wrong study design            |
| Still        | 2021 | A Pilot Study Evaluating the Effects of a Technology-Based and Positive Psychological Training Intervention on Blood Pressure in African Americans With Hypertension                                                    | Journal of primary care & community health | Insufficient data             |
| Volpp        | 2017 | Effect of Electronic Reminders, Financial Incentives, and Social Support on Outcomes After Myocardial Infarction: The HeartStrong Randomized Clinical Trial                                                             | JAMA internal medicine                     | Wrong outcomes                |
| Wakefield    | 2011 | Effectiveness of Home Telehealth in Comorbid Diabetes and Hypertension: A Randomized, Controlled Trial                                                                                                                  | Telemedicine journal and e-health          | Insufficient data             |
| Yue          | 2021 | Home blood pressure telemonitoring for improving blood pressure control in middle-aged and elderly patients with hypertension                                                                                           | Journal of clinical hypertension           | Ineligible patient population |

**eTable 6.** Subgroup analysis showing change in SBP at 6 months

| <b>Subgroup</b>                                                         | <b>Number of studies</b> | <b>Heterogeneity (I<sup>2</sup>)</b> | <b>Difference in change in SBP, treatment vs control</b> | <b>p-value subgroup comparison</b> |
|-------------------------------------------------------------------------|--------------------------|--------------------------------------|----------------------------------------------------------|------------------------------------|
| <b>Overall, change in SBP, 6month</b>                                   | <b>10</b>                | <b>80.3%</b>                         | <b>-2.74 (-6.43, 0.95)</b>                               | <b>n/a</b>                         |
| Used remote BP monitoring                                               | 7                        | 82.7%                                | -4.22 (-9.17, 0.72)                                      | 0.24                               |
| - no remote BP monitoring                                               | 3                        | 0%                                   | -0.26 (-2.95, 2.43)                                      |                                    |
| Race/ethnic focused                                                     | 2                        | 0%                                   | 3.91 (-1.60, 9.42)                                       | 0.12                               |
| - not race based                                                        | 8                        | 81.8%                                | -3.95 (-7.88, -0.01)                                     |                                    |
| Pilot study                                                             | 2                        | 0%                                   | 3.91 (-1.60, 9.42)                                       | 0.12                               |
| - not pilot study                                                       | 8                        | 81.8%                                | -3.95 (-7.88, -0.01)                                     |                                    |
| BP primary outcome                                                      | 6                        | 86.5%                                | -4.17 (-9.65, 1.30)                                      | 0.30                               |
| - BP not primary outcome                                                | 4                        | 0%                                   | -0.44 (-3.07, 2.20)                                      |                                    |
| BP controlled at baseline, ≤140                                         | 4                        | 29.3%                                | 0.85 (-2.00, 3.69)                                       | 0.02                               |
| - BP not controlled at baseline                                         | 6                        | 75.7%                                | -5.87 (-10.55, -1.18)                                    |                                    |
| <i>Abbreviations:</i> SBP, systolic blood pressure; BP, blood pressure. |                          |                                      |                                                          |                                    |

**eTable 7.** Subgroup analysis showing change in DBP at 6 months

| Subgroup                                                                | Number of studies | Heterogeneity (I <sup>2</sup> ) | Difference in change in DBP, treatment vs control | p-value subgroup comparison |
|-------------------------------------------------------------------------|-------------------|---------------------------------|---------------------------------------------------|-----------------------------|
| <b>Overall, change in DBP, 6month</b>                                   | <b>10</b>         | <b>70.5%</b>                    | <b>-1.11 (-3.09, 0.87)</b>                        | <b>n/a</b>                  |
| Used remote BP monitoring                                               | 7                 | 78.9%                           | -1.30 (-4.20, 1.61)                               | 0.71                        |
| - no remote BP monitoring                                               | 3                 | 0%                              | -0.97 (-2.71, 0.77)                               |                             |
| Race/ethnic focused                                                     | 2                 | 0%                              | 1.57 (-2.59, 5.73)                                | 0.31                        |
| - not race based                                                        | 8                 | 75.9%                           | -1.50 (-3.70, 0.71)                               |                             |
| Pilot study                                                             | 2                 | 0%                              | 1.57 (-2.59, 5.73)                                | 0.31                        |
| - not pilot study                                                       | 8                 | 75.9%                           | -1.50 (-3.70, 0.71)                               |                             |
| BP primary outcome                                                      | 6                 | 79.0%                           | -1.93 (-4.86, 0.99)                               | 0.31                        |
| - BP not primary outcome                                                | 4                 | 0%                              | -0.62 (-2.30, 1.07)                               |                             |
| BP controlled at baseline, ≤140                                         | 4                 | 50.7%                           | 0.22 (-2.05, 2.48)                                | 0.17                        |
| - BP not controlled at baseline                                         | 6                 | 72.1%                           | -2.18 (-5.02, 0.66)                               |                             |
| <i>Abbreviations:</i> DBP, systolic blood pressure; BP, blood pressure. |                   |                                 |                                                   |                             |

**eTable 8.** Subgroup analysis showing SBP values at 6 months

| Subgroup                                                                | Number of studies | Heterogeneity (I <sup>2</sup> ) | Difference in SBP, treatment vs control | p-value subgroup comparison |
|-------------------------------------------------------------------------|-------------------|---------------------------------|-----------------------------------------|-----------------------------|
| <b>Overall, SBP at 6month</b>                                           | <b>12</b>         | <b>77.4%</b>                    | <b>-4.24 (-7.33, -1.14)</b>             | <b>n/a</b>                  |
| Used remote BP monitoring                                               | 8                 | 81.6%                           | -5.64 (-9.49, -1.79)                    | 0.16                        |
| - no remote BP monitoring                                               | 4                 | 21.9%                           | -1.04 (-4.65, 2.57)                     |                             |
| Race/ethnic focused                                                     | 5                 | 0%                              | -2.54 (-5.20, 0.12)                     | 0.26                        |
| - not race based                                                        | 7                 | 85.5%                           | -5.56 (-10.04, -1.09)                   |                             |
| Pilot study                                                             | 4                 | 0%                              | -3.41 (-6.48, -0.34)                    | 0.73                        |
| - not pilot study                                                       | 8                 | 84.9%                           | -4.51 (-8.66, -0.36)                    |                             |
| BP primary outcome                                                      | 8                 | 81.5%                           | -5.82 (-9.52, -2.12)                    | 0.08                        |
| - BP not primary outcome                                                | 4                 | 0%                              | 0.14 (-3.28, 3.56)                      |                             |
| BP controlled at baseline, ≤140                                         | 6                 | 16.0%                           | -1.36 (-4.11, 1.38)                     | 0.10                        |
| - BP not controlled at baseline                                         | 6                 | 83.7%                           | -6.35 (-10.79, -1.92)                   |                             |
| <i>Abbreviations:</i> SBP, systolic blood pressure; BP, blood pressure. |                   |                                 |                                         |                             |

**eTable 9.** Subgroup analysis showing DBP values at 6 months

| Subgroup                                                                 | Number of studies | Heterogeneity (I <sup>2</sup> ) | Difference in DBP, treatment vs control | p-value subgroup comparison |
|--------------------------------------------------------------------------|-------------------|---------------------------------|-----------------------------------------|-----------------------------|
| <b>Overall, DBP at 6month</b>                                            | <b>12</b>         | <b>67.6%</b>                    | <b>-1.86 (-3.82, 0.10)</b>              | <b>n/a</b>                  |
| Used remote BP monitoring                                                | 8                 | 73.5%                           | -2.42 (-5.10, 0.26)                     | 0.42                        |
| - no remote BP monitoring                                                | 4                 | 21.0%                           | -0.51 (-2.67, 1.65)                     |                             |
| Race/ethnic focused                                                      | 5                 | 3.7%                            | -0.85 (-3.09, 1.39)                     | 0.44                        |
| - not race based                                                         | 7                 | 80.7%                           | -2.46 (-5.32, 0.39)                     |                             |
| Pilot study                                                              | 4                 | 8.1%                            | -2.25 (-5.36, 0.85)                     | 0.85                        |
| - not pilot study                                                        | 8                 | 77.8%                           | -1.74 (-4.19, 0.71)                     |                             |
| BP primary outcome                                                       | 8                 | 73.0%                           | -2.67 (-5.18, -0.16)                    | 0.20                        |
| - BP not primary outcome                                                 | 4                 | 0%                              | 0.29 (-1.73, 2.31)                      |                             |
| BP controlled at baseline, ≤140                                          | 6                 | 43.2%                           | -0.71 (-2.84, 1.43)                     | 0.31                        |
| - BP not controlled at baseline                                          | 6                 | 71.8%                           | -2.75 (-5.75, 0.26)                     |                             |
| <i>Abbreviations:</i> DBP, diastolic blood pressure; BP, blood pressure. |                   |                                 |                                         |                             |

**eFigure 1.** Differences in diastolic blood pressure changes from baseline to follow-up time points between digital health intervention and control groups

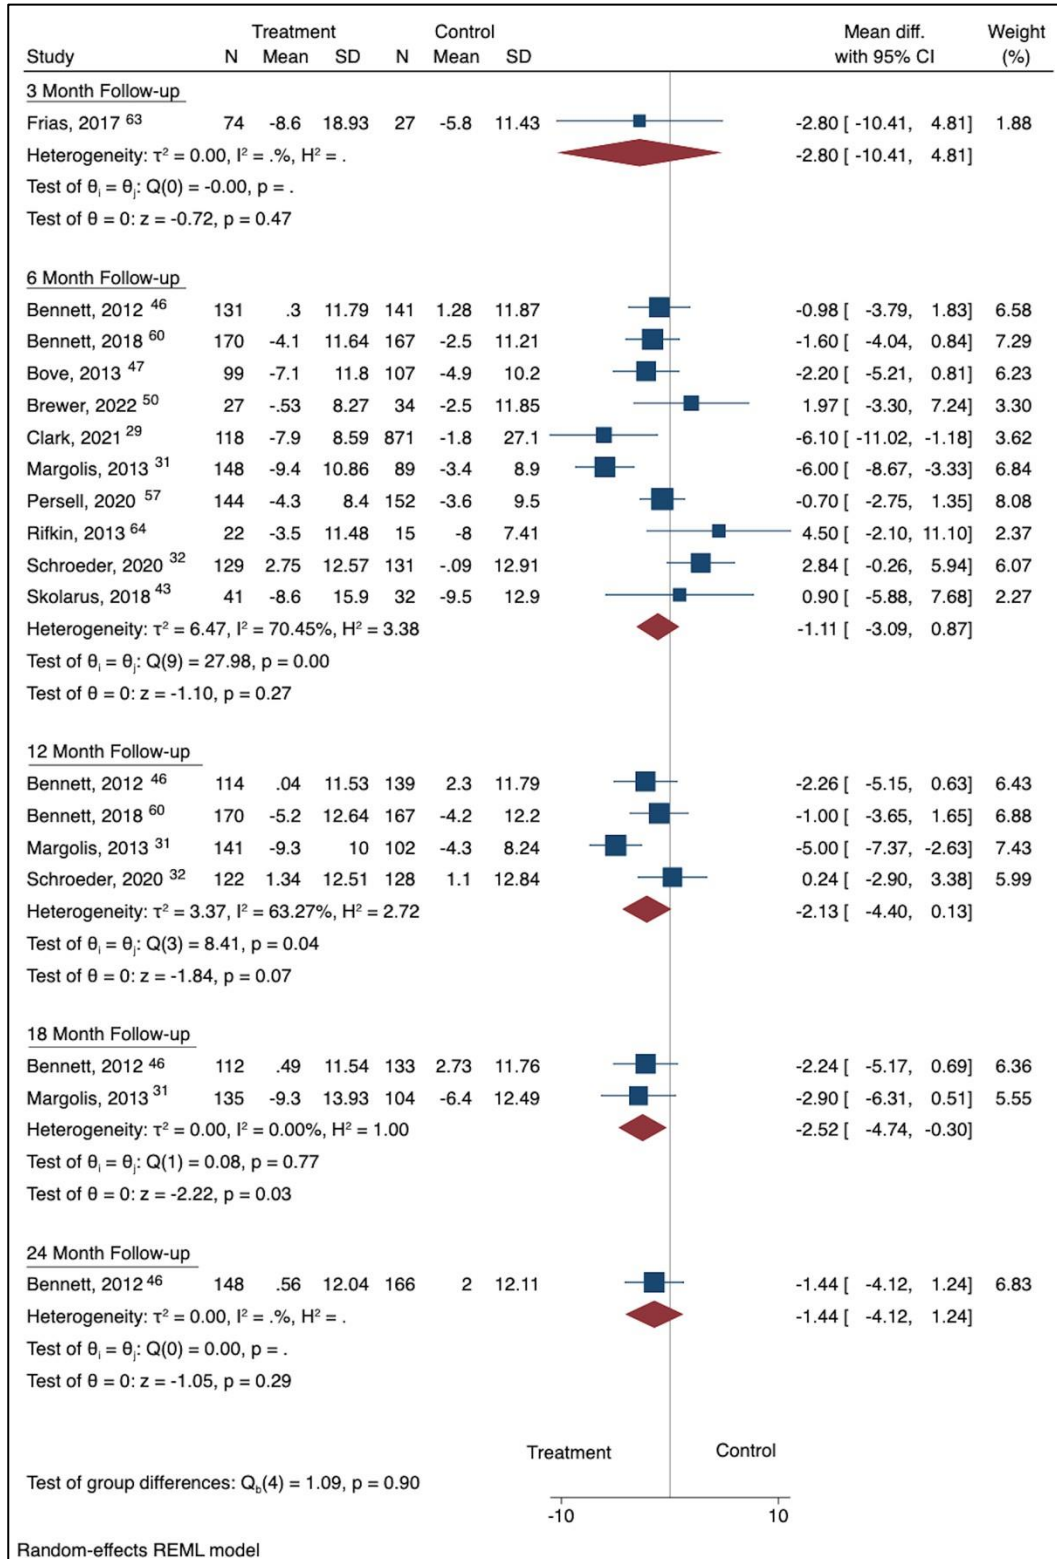

**eFigure 2.** Differences in follow-up diastolic blood pressures between digital health intervention and control groups at different time points

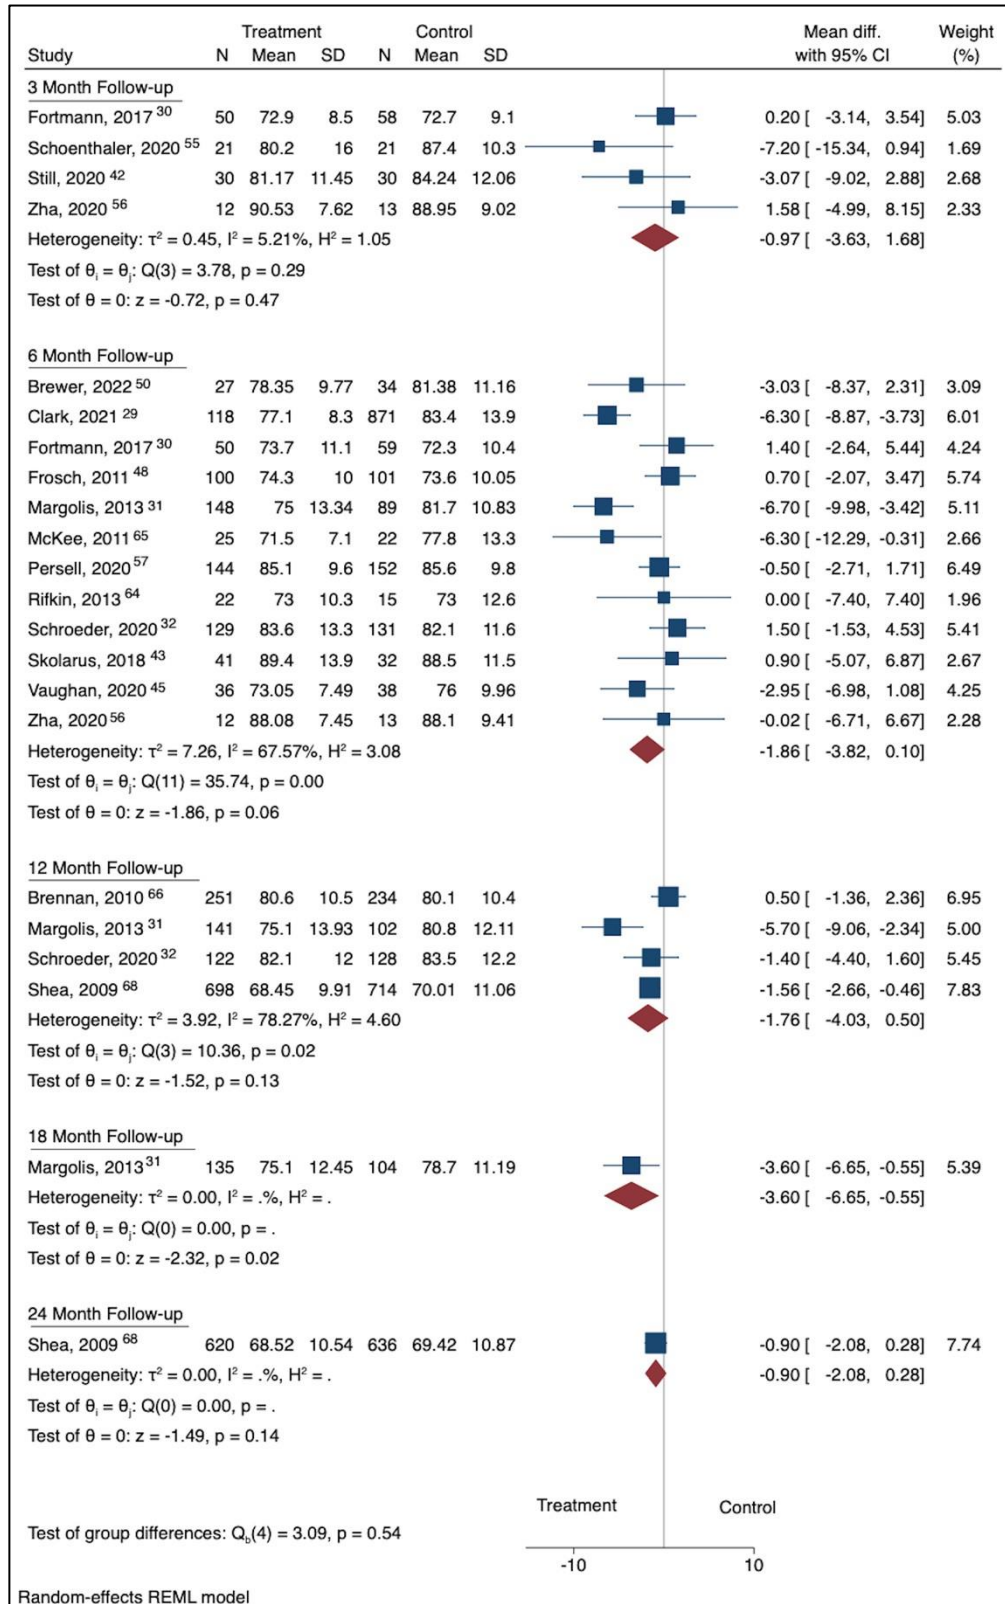



**eFigure 3.** Sensitivity analysis assessing for the presence of publication bias using the change in systolic blood pressure (SBP) outcome at the 6-month follow-up duration (top); leave-one-out meta-analysis results for the same outcome as above (bottom)

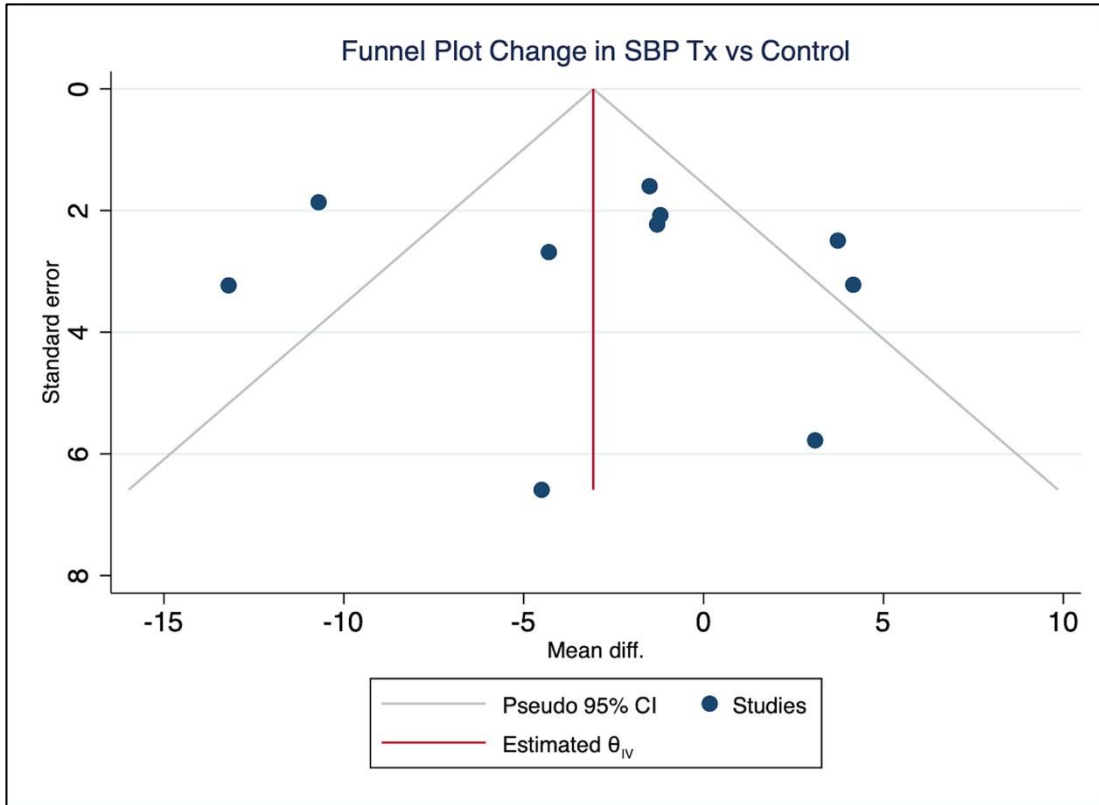

| Omitted study   | Mean diff.<br>with 95% CI | p-value |
|-----------------|---------------------------|---------|
| Bennett, 2012   | -2.91 [ -7.07, 1.26]      | 0.171   |
| Bennett, 2018   | -2.92 [ -7.09, 1.25]      | 0.169   |
| Bove, 2013      | -2.54 [ -6.67, 1.60]      | 0.230   |
| Brewer, 2022    | -3.49 [ -7.25, 0.27]      | 0.069   |
| Clark, 2021     | -1.68 [ -5.05, 1.68]      | 0.326   |
| Margolis, 2013  | -1.63 [ -5.03, 1.76]      | 0.346   |
| Persell, 2020   | -2.89 [ -7.10, 1.31]      | 0.178   |
| Rifkin, 2013    | -2.63 [ -6.54, 1.27]      | 0.187   |
| Schroeder, 2020 | -3.55 [ -7.31, 0.20]      | 0.064   |
| Skolarus, 2018  | -3.11 [ -6.97, 0.75]      | 0.114   |

Random-effects REML model

**eFigure 4.** Sensitivity analysis assessing for the presence of publication bias using the follow-up systolic blood pressure (SBP) value outcome at the 6-month follow-up duration (top); leave-one-out meta-analysis results for the same outcome as above (bottom)

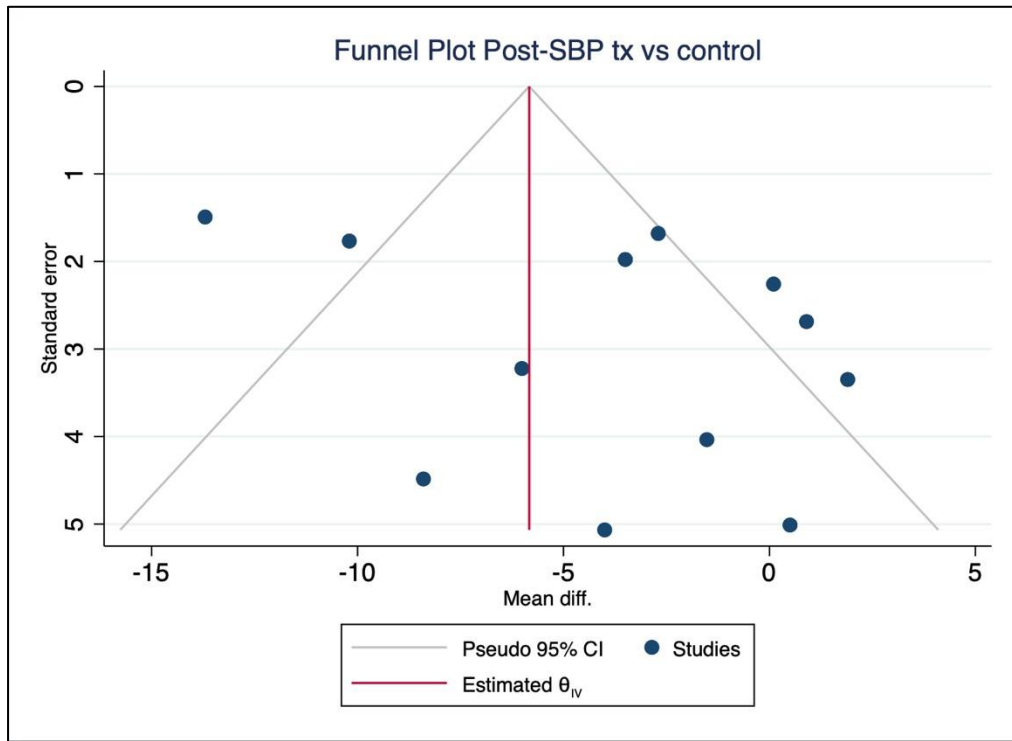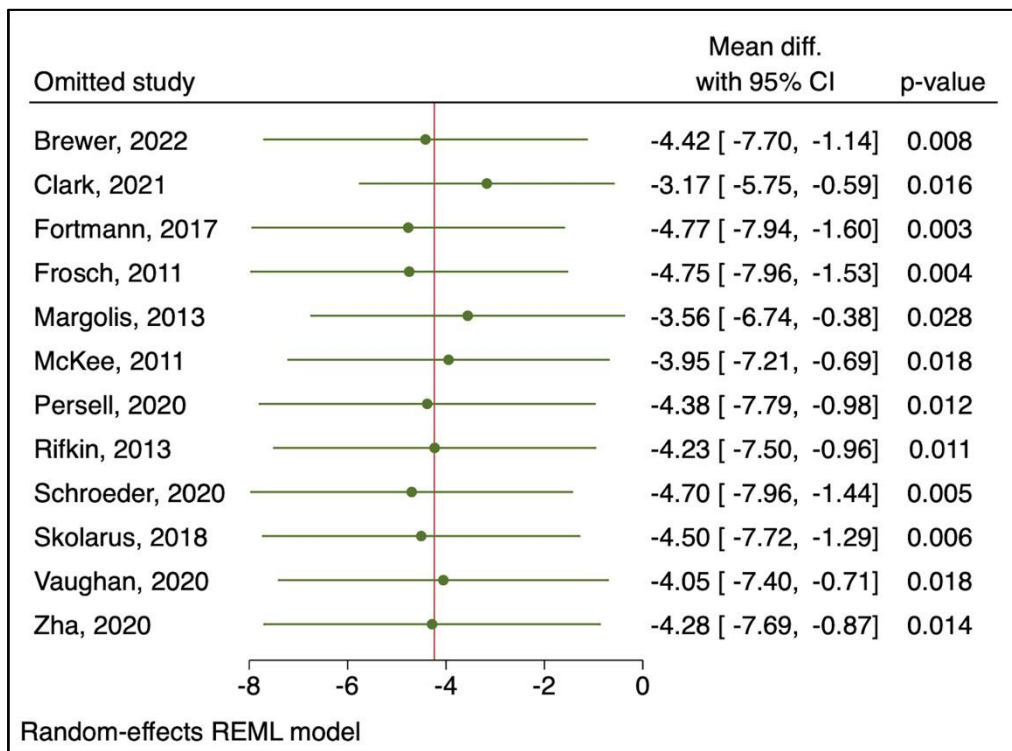

**eFigure 5.** Sensitivity analysis assessing for the presence of publication bias using the change in diastolic blood pressure (DBP) outcome at the 6-month follow-up duration (top); leave-one-out meta-analysis results for the same outcome as above (bottom)

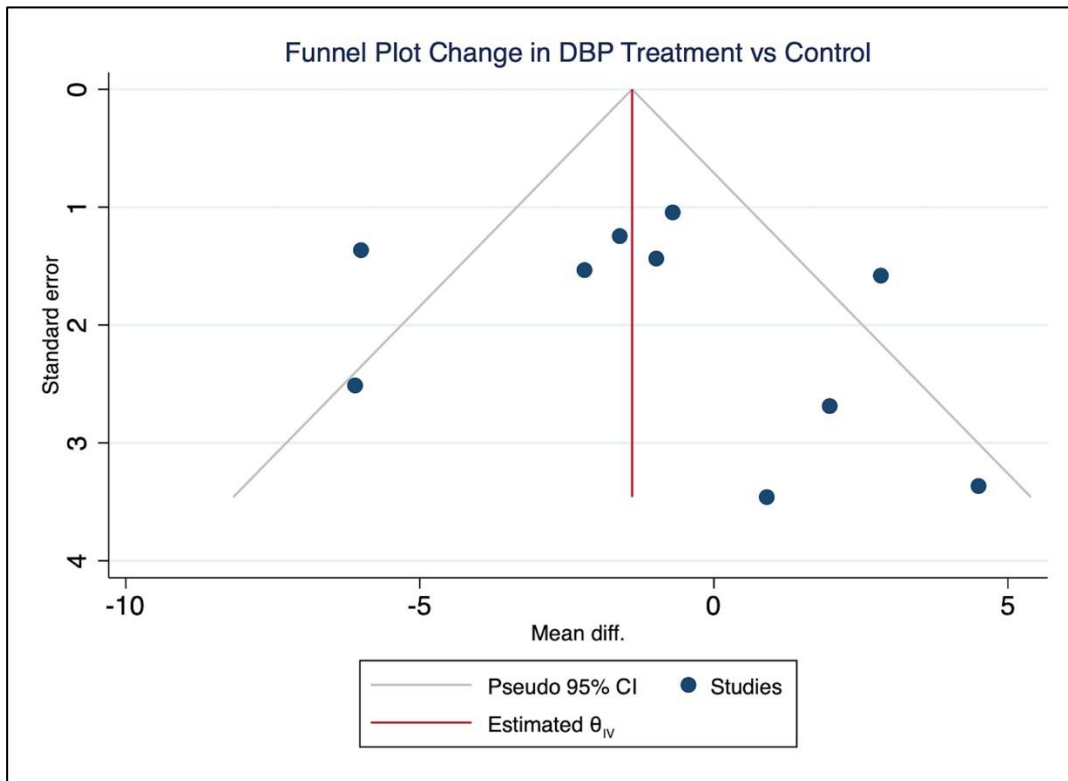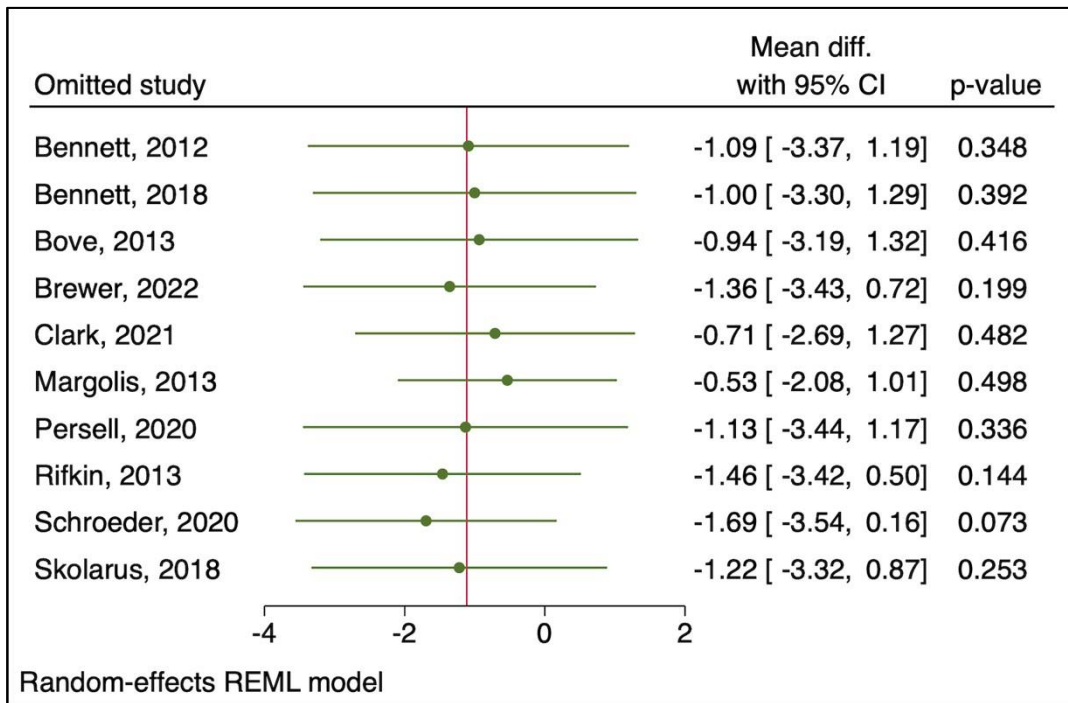

**eFigure 6.** Sensitivity analysis assessing for the presence of publication bias using the follow-up diastolic blood pressure (DBP) value outcome at the 6-month follow-up duration (top); leave-one-out meta-analysis results for the same outcome as above (bottom)

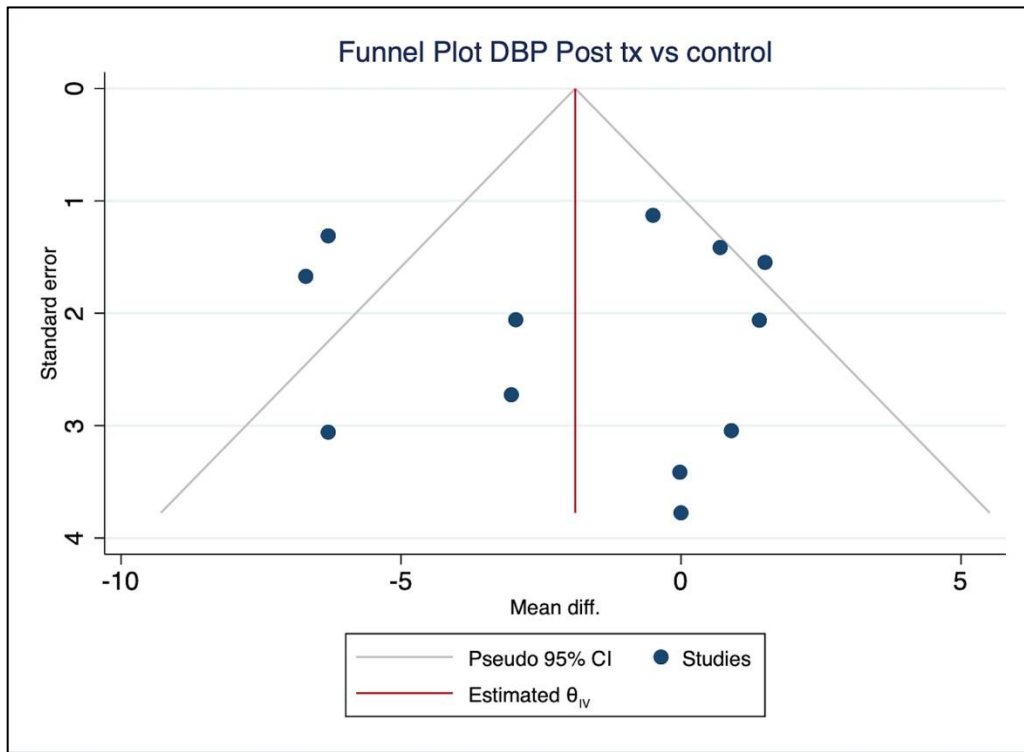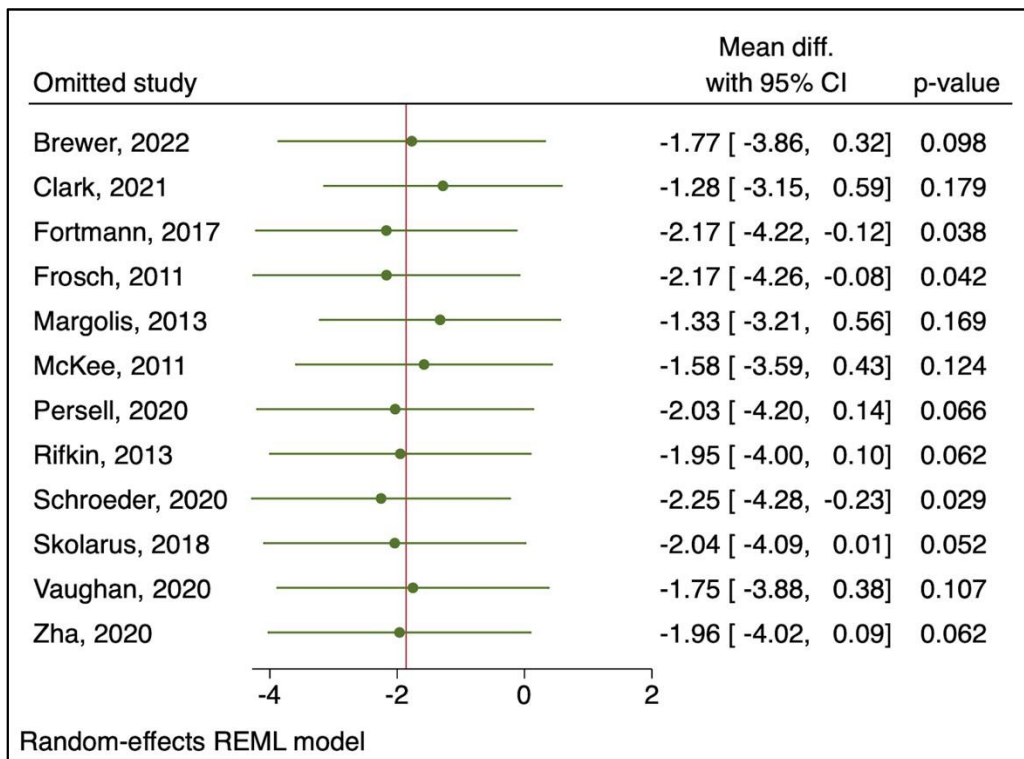

**eFigure 7.** Risk of bias assessment for included studies.

| Study          | Risk of bias domains |    |    |    |    | Overall |
|----------------|----------------------|----|----|----|----|---------|
|                | D1                   | D2 | D3 | D4 | D5 |         |
| Anderson 2010  | +                    | +  | +  | +  | +  | +       |
| Bennett 2018   | +                    | +  | +  | +  | +  | +       |
| Bennett 2012   | +                    | +  | +  | +  | +  | +       |
| Bosworth 2018  | +                    | +  | +  | +  | +  | +       |
| Bosworth 2009  | +                    | +  | +  | +  | +  | +       |
| Bove 2013      | +                    | +  | +  | +  | +  | +       |
| Brennan 2010   | +                    | +  | +  | +  | +  | +       |
| Brewer 2022    | -                    | -  | +  | +  | +  | +       |
| Chandler 2019  | +                    | +  | +  | +  | +  | +       |
| Clark 2021     | -                    | -  | +  | +  | +  | +       |
| Crowley 2013   | +                    | +  | +  | -  | -  | -       |
| Fortmann 2017  | +                    | +  | +  | +  | +  | +       |
| Frias 2017     | -                    | -  | +  | +  | +  | +       |
| Frosch 2011    | +                    | +  | +  | +  | +  | +       |
| Margolis 2013  | +                    | +  | +  | +  | +  | +       |
| McKee 2011     | +                    | +  | -  | +  | +  | +       |
| Morawski 2018  | +                    | +  | +  | +  | +  | +       |
| Persell 2020   | +                    | +  | +  | +  | +  | +       |
| Rifkin 2013    | +                    | +  | +  | +  | +  | +       |
| Still 2020     | +                    | +  | +  | +  | +  | +       |
| Tuot 2019      | +                    | -  | +  | +  | +  | +       |
| Vaughan 2020   | +                    | +  | +  | +  | +  | +       |
| Zha 2020       | +                    | +  | +  | +  | +  | +       |
| Skolarus 2018  | +                    | +  | -  | +  | +  | +       |
| Naqvi 2022     | +                    | +  | -  | +  | +  | +       |
| Schroeder 2020 | +                    | +  | +  | +  | +  | +       |
| Shea 2009      | +                    | +  | +  | +  | +  | +       |

Domains:  
D1: Bias arising from the randomization process.  
D2: Bias due to deviations from intended intervention.  
D3: Bias due to missing outcome data.  
D4: Bias in measurement of the outcome.  
D5: Bias in selection of the reported result.

Judgement  
- Some concerns  
+ Low
