# Supplementary material for: Digital Health Interventions for Hypertension Management in US Populations Experiencing Health Disparities: A Systematic Review and Meta-Analysis
Source: PubMed Central journal article supplement (PMC10867699; doi:10.1001/jamanetworkopen.2023.56070), 2024-02-14
Supplement: jamanetwopen-e2356070-s002.pdf [file jamanetwopen-e2356070-s002.pdf]

## Data Sharing Statement

Katz. Digital Health Interventions for Hypertension Management in US Populations Experiencing Health Disparities. *JAMA Netw Open*. Published February 14, 2024. doi:10.1001/jamanetworkopen.2023.56070

### Data

**Data available:** Yes

**Data types:** Data dictionary

**How to access data:** Upon request, we will share the literature review, data dictionary, and analytic code. Please contact: [erica.spatz@yale.edu](mailto:erica.spatz@yale.edu)

**When available:** With publication

### Supporting Documents

**Document types:** Statistical/analytic code

**How to access documents:** Please contact: [erica.spatz@yale.edu](mailto:erica.spatz@yale.edu)

**When available:** With publication

### Additional Information

**Who can access the data:** Anyone requesting the data.

**Types of analyses:** For any purpose

**Mechanisms of data availability:** With investigator support

**Any additional restrictions:** None
